# Supplementary material for: Analysis of caesarean section and neonatal outcome using the Robson classification in a rural district hospital in Tanzania: an observational retrospective study
Source: PubMed Central journal article supplement — BMJ Open. 2019 Dec 9;9(12):e033348. doi: 10.1136/bmjopen-2019-033348 (PMC6924846; doi:10.1136/bmjopen-2019-033348), 2019-12-09
Supplement: bmjopen-2019-033348.draft_revisions.pdf [file bmjopen-2019-033348.draft_revisions.pdf]

# BMJ Open

BMJ Open is committed to open peer review. As part of this commitment we make the peer review history of every article we publish publicly available.

When an article is published we post the peer reviewers' comments and the authors' responses online. We also post the versions of the paper that were used during peer review. These are the versions that the peer review comments apply to.

The versions of the paper that follow are the versions that were submitted during the peer review process. They are not the versions of record or the final published versions. They should not be cited or distributed as the published version of this manuscript.

BMJ Open is an open access journal and the full, final, typeset and author-corrected version of record of the manuscript is available on our site with no access controls, subscription charges or pay-per-view fees (<http://bmjopen.bmj.com>).

If you have any questions on BMJ Open's open peer review process please email [info.bmjopen@bmj.com](mailto:info.bmjopen@bmj.com)

# BMJ Open

## Robson Classification System applied in a rural District Hospital in Tanzania

|                               |                                                                                                                                                                                                                                                                                                                                                                                                                                                                                                                                                                                             |
|-------------------------------|---------------------------------------------------------------------------------------------------------------------------------------------------------------------------------------------------------------------------------------------------------------------------------------------------------------------------------------------------------------------------------------------------------------------------------------------------------------------------------------------------------------------------------------------------------------------------------------------|
| Journal:                      | <i>BMJ Open</i>                                                                                                                                                                                                                                                                                                                                                                                                                                                                                                                                                                             |
| Manuscript ID                 | bmjopen-2019-033348                                                                                                                                                                                                                                                                                                                                                                                                                                                                                                                                                                         |
| Article Type:                 | Research                                                                                                                                                                                                                                                                                                                                                                                                                                                                                                                                                                                    |
| Date Submitted by the Author: | 31-Jul-2019                                                                                                                                                                                                                                                                                                                                                                                                                                                                                                                                                                                 |
| Complete List of Authors:     | Tognon, Francesca; Universita degli Studi di Padova Dipartimento di Medicina, Dipartimento di Salute della Donna e del Bambino; Cuamm Medici con l'Africa,<br>Borghero, Angela; Cuamm Medici con l'Africa<br>Putoto, G; Cuamm Medici con l'Africa<br>Maziku, Donald ; St. John of the Cross Hospital, Maternity Department<br>Torelli, Giovanni; Cuamm Medici con l'Africa<br>Betran, Ana Pilar; World Health Organization, UNDP/UNFPA/UNICEF/WHO/World Bank Special Programme of Research, Development and Research Training in Human Reproduction (HRP), Reproductive Health and Research |
| Keywords:                     | 10-Group Classification System, Cesarean Section, Tanzania, Robson classification, Neonatal outcome                                                                                                                                                                                                                                                                                                                                                                                                                                                                                         |
|                               |                                                                                                                                                                                                                                                                                                                                                                                                                                                                                                                                                                                             |

SCHOLARONE™  
Manuscripts

# Robson Classification System applied in a rural District Hospital in Tanzania

**Authors:** Francesca Tognon<sup>1</sup>, Angela Borghero<sup>2</sup>, Giovanni Putoto<sup>3</sup>, Donald Maziku<sup>4</sup>, Giovanni Fernando Torelli<sup>2</sup>, Ana Pilar Betrán<sup>5</sup>

<sup>1</sup> Department of Women's and Children's Health – University of Padova, Italy.

<sup>2</sup> Doctors with Africa CUAMM, Padova.

<sup>3</sup> Operational Research Unit, Doctors with Africa CUAMM, Padova, Italy

<sup>4</sup> St. John of the Cross Tosamaganga Hospital, Tanzania

<sup>5</sup> UNDP/UNFPA/UNICEF/WHO/World Bank Special Programme of Research, Development and Research Training in Human Reproduction (HRP), Department of Reproductive Health and Research, World Health Organization (WHO), Geneva, Switzerland

## Corresponding author:

Francesca Tognon,

Department of Women's and Children's Health

Via Giustiniani 3, 35128 Padova

[francesca.tognon.1@phd.unipd.it](mailto:francesca.tognon.1@phd.unipd.it)

+39 3466128684

**Word count** (excluding title page, abstract, references, figures and tables): 3.474

## Abstract

**Objective:** Caesarean section rates have increased worldwide over the last decades. In 2015, WHO proposed the use of the 10-group classification as a global standard for assessing, monitoring and comparing caesarean section rates. The aim of our work was to assess the pattern of CS rates according to the Robson Classification and describe maternal and perinatal outcomes by group in a District Hospital in Tanzania.

**Design:** Observational retrospective study

**Setting:** District Hospital in Tanzania

**Participants:** 3012 delivered in Tosamaganga Hospital from 1<sup>st</sup> January to 30<sup>th</sup> June 2014 and from 1<sup>st</sup> March to 30<sup>th</sup> November 2015.

**Results:** The institutional CS rate was 35.2% of all births in an obstetric population of about 90% in Robson groups 1 through 5. More than 40% of all CS in the hospital occurred in Groups 1 and 3 and the most frequent indication to perform CS was for previous scar (39,2%). Major contribution to severe neonatal outcome was given by Group 1 (27.7%), Group 10 (24.5%) and Group 3 (19,1%).

**Conclusion:** A high CS rate was registered in Tosamaganga Hospital, particularly in low risk Groups as 1 and 3. The analysis of Robson Classification and the neonatal outcomes may indicate the need to improve management of labour and to provide timely referral to prevent women from arriving in hospital in critical conditions.

## Keywords

10-Group Classification System; Cesarean Section; Tanzania; Robson classification; Neonatal outcome;

### Strengths and limitations of this study

- The study uses data from a rural setting, giving the opportunity to compare it with other contexts in the country.
- The availability of outcome data, indication for CS and data on who performed the CS allowed a more contextualized interpretation of CS rates in each group.
- The combination of two different period of 2014 and 2015 increase the sample and avoid to have seasonal differences.
- Data derived from handwritten records and some information may not be accurate.
- The analysis permit to propose potential strategies to address the overuse of caesarean birth.

## Introduction

Cesarean section (CS) is a lifesaving operation used when obstetric pathologies or urgent conditions preclude a vaginal delivery[1]. The cesarean section rate is widely considered an important global indicator for measuring access to obstetric services[2] and safe and timely care for mothers and newborns. Ensuring access to CS is an essential strategy to reduce maternal mortality[3] and to reach the Sustainable Development Goal number 3[4].

However, as a surgical operation, this procedure is associated with increased risk of maternal morbidity, such as postpartum haemorrhage, blood transfusions, hysterectomy or even death, and the uterine scar can increase the risk of uterine rupture, placenta previa or accreta in subsequent pregnancies[5-7]. These risks are higher in settings without access to safe surgery or with capacity to treat complications safely. Compared with vaginal delivery, CS also entails more health personnel and higher costs for hospitals and society too[8]. Nevertheless, in the past three decades CS rates have steadily increased in many countries, especially middle and high income countries, and have become an important and controversial public health concern[9, 10]. In 1985 the World Health Organization (WHO) stated that “There is no justification for any region to have a caesarean section (CS) rate higher than 10–15%”. This statement was justified upon data mainly from northern European countries which achieved good maternal and perinatal outcomes with that rate of CS[11]. Numerous studies have analyzed the relationship between CS rate and maternal and neonatal mortality trying to define the optimal limit/range associated with minimum maternal and perinatal risks[12-15], but there are multiple limitations in all approaches that limit the interpretation of results[16]. In 2015 a new WHO policy statement superseding the previous 1985 restated that “every effort should be made to provide caesarean sections to women in need, rather than striving to achieve a specific rate”[17] acknowledging the lack of a universal ideal CS rate.

However, the worldwide rising CS rate trend is widely regarded as a concern considering the above-mentioned health and socio-economic consequences as well as the unknown ecologic or intergenerational consequences. In addition, the increase of CS is not confined to high- or middle-income countries. Low-income countries are suffering the consequences of the unequal rise of CS. In these countries, inequalities are exacerbated by the unnecessary overuse of CS in some facilities, settings or groups of women which coexist with others where high levels of

1  
2  
3 maternal and perinatal mortality are the consequence of lack of access to CS.  
4  
5

6 Efforts have been placed in the design of effective strategies to reduce unnecessary CS. Facing  
7 this challenge, it is essential to study the population of women undergoing CS, to identify high  
8 risk groups for poor outcomes and to investigate the reasons for these trends in different groups  
9 and settings[18]. For many decades, the lack of a standard and internationally accepted  
10 classification system for CS has precluded a more effective progress in understanding the  
11 raising trend and act upon it. The ten-group Robson Classification system is now recommended  
12 by WHO and FIGO for assessing, monitoring and comparing CS rates within healthcare  
13 facilities over time and between facilities[17, 19]. The Robson Classification is simple,  
14 clinically relevant, accountable, replicable and verifiable[20], all critical characteristics for a  
15 classification system.  
16  
17  
18  
19  
20  
21  
22  
23  
24  
25

26 The aim of our work was to assess the pattern of CS rates according to the Robson  
27 Classification and describe maternal and perinatal outcomes by group in a District Hospital in  
28 Tanzania. Based on these data, we propose potential strategies to address the overuse of  
29 caesarean birth and provide lessons learnt with applicability for other low-income countries  
30 and setting on how to use the classification.  
31  
32  
33  
34  
35  
36

## 37 **Methods**

### 38 **Design and participants**

39 This was an observational retrospective study, conducted in a District Hospital in Tanzania.  
40 We included all women delivered in Tosamaganga Hospital from 1<sup>st</sup> January to 30<sup>th</sup> June 2014  
41 and from 1<sup>st</sup> March to 30<sup>th</sup> November 2015. We choose to combine these periods because in  
42 these selected months an Obstetrics and Gynecology resident doctor was responsible for the  
43 completeness of patient's charts. In addition, this selection gave us the possibility to increase  
44 our study population and avoid seasonal bias. Each woman was categorized into one of ten  
45 groups, using the Robson Classification.  
46  
47  
48  
49  
50  
51  
52  
53  
54  
55

### 56 **Setting**

57 St. John of the Cross Tosamaganga Hospital belongs to the Roman Catholic Church, Diocese  
58 of Iringa, and since 2007 is used as a Council Designated Hospital for Iringa District Council,  
59  
60

1  
2  
3 according to an agreement with the Local Government Authorities (LGAs) which is renewed  
4 every 5 years in the context of the Private Public Partnership (PPP). Tosamaganga Hospital,  
5 supported by Doctors with Africa CUAMM, an Italian NGO, is the only C-EmONC  
6 (Comprehensive Emergency Obstetric and Newborn Care) Center in Iringa Rural District, with  
7 an estimated population of 265.000 inhabitants.  
8  
9

10 During the study period, in Tosamaganga hospital about 2300 deliveries occurred every year.  
11 The hospital had a total of 165 beds; maternity department had 48 beds divided in Obstetrics  
12 (12 beds), Vaginal Post-Partum (18 beds), Caesarean Section Post-Partum (18 beds), Labour  
13 Room and a small neonatal resuscitation room.  
14  
15

16 In the district, other smaller health facilities were present (10 Health Center and 62  
17 dispensaries), but none of them was allowed to perform CS.  
18

19 The maternity department had 2 functioning operating theatres, one for the major and one for  
20 minor surgery intervention (e.g. Dilation and Curettage, dressing).  
21

22 Human resources allowed to perform CS during the study included 1 Gynecologist, 1 Medical  
23 Doctor (MD) and 5 Assistant Medical Officers (AMO). Maternity staff was composed also by  
24 10 midwives divided into three shifts (3 during the morning, 2 in the afternoon, 2 during the  
25 night) and 1 Clinical Officer.  
26  
27  
28  
29  
30  
31  
32

### 33 **Variables and Data Collection**

34 For each woman giving birth in the hospital, we collected data on maternal age, obstetric  
35 history (parity, previous caesarean section), foetal presentation, gestational age, final mode of  
36 delivery (simple vaginal delivery-SVD, operative vaginal delivery-OVD, Cesarean section-  
37 CS) and onset of labour (spontaneous, induced, pre-labour CS).  
38  
39

40 For each woman who underwent to CS, one of the following mutually exclusive indication for  
41 CS was assigned: urgent or emergency CS (considering eclamptic, abruptio placenta, uterine  
42 rupture), mechanical or dynamic dystocia, previous scar, malpresentation, cephalopelvic  
43 disproportion, foetal distress, breech, twins and others. If there were more than one indication,  
44 the priority was given according to the order in the list. We collected maternal outcomes (death  
45 before discharge) and neonatal outcomes (birth weight, Apgar score at 1 and 5 minutes, death  
46 before discharge).  
47  
48  
49

50 We also registered if patient had been formally referred from village-level dispensaries or rural  
51 Health Center or self-referred.  
52  
53  
54  
55  
56  
57  
58  
59  
60



1  
2  
3 Because of the elevated number of missing or wrong date for last menstrual period (LMP), we  
4 used birth weight  $\geq 2500$  gr as a proxy for gestational age  $\geq 37$  weeks[21]. This adaptation has  
5 been suggested and previously used for the Robson Classification in settings where accurate  
6 assignment of gestational age may be challenging[22-24].  
7  
8

9  
10 Exclusion criteria was birth weight  $< 500$  gr (proxy for gestational aged  $< 22$  weeks) and  
11 incomplete information on obstetric history, mode of delivery and onset of labour. Congenital  
12 anomalies were included. For twin deliveries, only the outcome of the first twin was  
13 considered.  
14  
15

16  
17  
18 The cesarean delivery rate was defined as the number of cesarean deliveries over the total  
19 number of live births[9, 15]. The maternal mortality rate was defined as the number of maternal  
20 deaths over the total number of women giving birth regardless of birth outcome. We defined a  
21 neonatal composite outcome: severe neonatal outcome as the total number of stillbirth, early  
22 neonatal death (death of a live born neonate, by discharge or day 7 of life whichever occur  
23 first) and birth discharged alive with Apgar score at 5 min  $< 7$ . Available data did not allow to  
24 differentiate fresh and macerated stillbirth. Deaths occurring after discharge were not captured.  
25 During the 2015 study period (from 1<sup>st</sup> March to 30<sup>th</sup> November) information was also collected  
26 on who performed CS (Gynecologist, medical doctor-MD, assistant medical doctor-AMD).  
27  
28  
29

30  
31  
32 Each woman was categorized into one of ten groups using the Robson Classification. We used  
33 the recommended subdivision for groups 2 and 4 into induced labour (2a or 4a) and pre-labour  
34 CS (2b or 4b). Group 5 was also divided into 5.1 (women with only one previous CS) and 5.2  
35 (women with two or more previous CS)[25]. Intrapartum and postpartum perinatal mortality  
36 has been analyzed by type of delivery and using the Robson Classification.  
37  
38  
39

#### 40 41 42 **Patient and Public Involvement**

43  
44 No patients/public were involved in defining the research question or the outcome measures,  
45 nor were they involved in the design and implementation of the study. There are no plans to  
46 involve patients/public in the dissemination of the results.  
47  
48  
49

#### 50 51 52 **Results**

53  
54 From 1<sup>st</sup> January to 30<sup>th</sup> June 2014 and from 1<sup>st</sup> March to 30<sup>th</sup> November 2015, 3052 women  
55 gave birth in the Tosamaganga hospital. Of these, 3012 (98.7%) deliveries had complete  
56  
57  
58  
59  
60

information and were included in the Robson classification. The institutional CS rate was 35.2% of all births.

Table 1 summarizes the characteristics of the study population: the mean age was 25,6 years (range 14-45 years). Among all deliveries, 1691 women were multiparous (56.1%), 370 (12,3%) had one previous CS, 111 (3,7%) two previous CS, 38 (1,3%) had 3 or more (Table 1).

Table 1: Characteristics of women delivered during the study period in Tosamaganga Hospital, Tanzania (n=3012).

|                 |                                           |              |
|-----------------|-------------------------------------------|--------------|
| Maternal Age    | <i>Mean</i>                               | 25,6         |
|                 | <i>Range</i>                              | 14-45        |
| Parity          | <i>Nulliparous (%)</i>                    | 1321 (43.9%) |
|                 | <i>Multiparous (%)</i>                    | 1691 (56.1%) |
| Previous CS     | <i>No Previous CS (%)</i>                 | 2493 (82.8%) |
|                 | <i>One Previous CS (%)</i>                | 370 (12.3%)  |
|                 | <i>Two Previous CS (%)</i>                | 111 (3.7%)   |
|                 | <i>Three or more previous CS (%)</i>      | 38 (1.3%)    |
| Referral status | <i>Self admitted (%)</i>                  | 2844 (94.4%) |
|                 | <i>Referred from other facilities (%)</i> | 168 (5.6%)   |

Table 2 presents the Robson Classification. Almost 90% of the women admitted for birth in this hospital were women in groups 1 through 5 and about two-thirds in groups 1 through 4.

Among nulliparous women with term singleton fetus in cephalic presentation (n=1184), 1128 (95.3%) went into labour spontaneously, 32 (2.7%) were induced and 24 (2%) had a pre-labour CS (Table 2 and 3). Similarly, among multiparous women with term singleton fetus in cephalic presentation (n=1019), 974 (95.6%) went into labour spontaneously, 21 (2%) were induced and 24 (2.4%) had a pre-labour CS.

Women admitted in the hospital for birth with term singleton fetus in cephalic presentation entering labour spontaneously represent 70% of the obstetric population and have CS rates of 27.4% and 15.1% in nulliparous and multiparous, respectively.

Table 2: The Robson Reporting Table and Neonatal outcomes, Tosamaganga Hospital, Tanzania, 2014-2015.

| Group | Number of CS in group                                                                            | Number of women in group | Group Size (%) | Group CS Rate (%) | Absolute group contribution to overall CS rate (%) | Relative contribution of group to overall CS rate (%) | Stillbirth [N stillbirth/N women (%)] | Early neonatal death* [N neonatal deaths/N women (%)] | Apgar < 7 at 5 minutes [N live birth Apgar <7/N women (%)] |                  |
|-------|--------------------------------------------------------------------------------------------------|--------------------------|----------------|-------------------|----------------------------------------------------|-------------------------------------------------------|---------------------------------------|-------------------------------------------------------|------------------------------------------------------------|------------------|
| 1     | Nulliparous, single cephalic, term pregnancy, in spontaneous labour                              | 309                      | 1128           | 37,5%             | 27,4%                                              | 10,3%                                                 | 29,2%                                 | 9 (0,8%)                                              | 28 (2,5%)                                                  | 24 (2,1%)        |
| 2     | Nulliparous, single cephalic, term pregnancy, induced labour or elective CS                      | 35                       | 56             | 1,9%              | 62,5%                                              | 1,2%                                                  | 3,3%                                  | 8 (14,3%)                                             | -                                                          | 1 (1,8%)         |
| 3     | Multiparous (excluding prev. CS), single cephalic, term pregnancy, in spontaneous labour         | 147                      | 974            | 32,3%             | 15,1%                                              | 4,9%                                                  | 13,9%                                 | 16 (1,6%)                                             | 13 (1,3%)                                                  | 13 (1,3%)        |
| 4     | Multiparous (excluding prev. CS), single cephalic, term pregnancy, induced labour or elective CS | 25                       | 45             | 1,5%              | 55,6%                                              | 0,8%                                                  | 2,4%                                  | 7 (15,6%)                                             | -                                                          | 1 (2,2%)         |
| 5     | One previous CS, single cephalic, term pregnancy                                                 | 404                      | 463            | 15,4%             | 87,3%                                              | 13,4%                                                 | 38,1%                                 | 5 (1,1%)                                              | 2 (0,4%)                                                   | 8 (1,7%)         |
| 6     | All nulliparous breeches                                                                         | 13                       | 21             | 0,7%              | 61,9%                                              | 0,4%                                                  | 1,2%                                  | 2 (9,5%)                                              | 2 (9,5%)                                                   | 3 (14,3%)        |
| 7     | All multiparous breeches (including prev. CS)                                                    | 16                       | 32             | 1,1%              | 50,0%                                              | 0,5%                                                  | 1,5%                                  | 5 (15,6%)                                             | 4 (12,5%)                                                  | -                |
| 8     | All multiple pregnancies (including prev. CS)                                                    | 48                       | 77             | 2,6%              | 62,3%                                              | 1,6%                                                  | 4,5%                                  | 3 (3,9%)                                              | 7 (9,1%)                                                   | -                |
| 9     | All abnormal lies (including prev. CS)                                                           | 30                       | 30             | 1,0%              | 100,0%                                             | 1,0%                                                  | 2,8%                                  | 1 (3,3%)                                              | 1 (3,3%)                                                   | 3 (10%)          |
| 10    | All single cephalic, preterm (including prev. CS)                                                | 33                       | 186            | 6,2%              | 17,7%                                              | 1,1%                                                  | 3,1%                                  | 22 /11,8%                                             | 17 (9,1%)                                                  | 15 (8,1%)        |
|       | <b>TOTAL</b>                                                                                     | <b>1060</b>              | <b>3012</b>    | <b>100%</b>       | <b>35,2%</b>                                       | <b>35,2%</b>                                          | <b>100%</b>                           | <b>78 (2,6%)</b>                                      | <b>74 (2,5%)</b>                                           | <b>68 (2,3%)</b> |

**Unclassifiable:** 40 cases, 1,3% (40/3052)

\* Early neonatal death was defined as the death of a live born neonate, by discharge or day 7 of life whichever occur first)

Table 3: Groups 2, 4 and 5 subdivisions

| Group | Number of CS in group                            | Number of women in group | Group Size (%) | Group CS Rate (%) | Absolute group contribution to overall CS rate (%) | Relative contribution of group to overall CS rate (%) |      |
|-------|--------------------------------------------------|--------------------------|----------------|-------------------|----------------------------------------------------|-------------------------------------------------------|------|
| 2a    | Nulliparous, single cephalic, S37 weeks, induced | 11                       | 32             | 1,1%              | 34,4%                                              | 0,4%                                                  | 1,0% |

|     |                                                                                |     |     |       |        |      |       |
|-----|--------------------------------------------------------------------------------|-----|-----|-------|--------|------|-------|
| 2b  | Nulliparous, single cephalic, S37 weeks, CS before labour                      | 24  | 24  | 0,8%  | 100,0% | 0,8% | 2,3%  |
| 4a  | Multiparous (excluding prev. CS), single cephalic, S37 weeks, induced          | 1   | 21  | 0,7%  | 4,8%   | 0,0% | 0,1%  |
| 4b  | Multiparous (excluding prev. CS), single cephalic, S37 weeks, CS before labour | 24  | 24  | 0,8%  | 100,0% | 0,8% | 2,3%  |
| 5.1 | One previous CS, single cephalic, S37 weeks                                    | 272 | 327 | 10,9% | 83,2%  | 9,0% | 25,7% |
| 5.2 | Two or more previous CS, single cephalic, S37 weeks                            | 132 | 136 | 4,5%  | 97,1%  | 4,4% | 12,5% |

Women in Group 5 (previous CS) constitute about 15% of the obstetric population of the hospital with a CS rate of 87%. Two-thirds of these women had just one previous CS while one-third had two or more CS (Table 2 and 3).

Overall, the most frequent indication to perform CS was one or more previous CS (39,2%), followed by dystocia (22,3%) and fetal distress (12,8%) (Table 4).

Table 4: Indication for CS in the study population

|                                |             |               |
|--------------------------------|-------------|---------------|
| Previous scar                  | 416         | 39,2%         |
| Mechanical or dynamic dystocia | 236         | 22,3%         |
| Foetal distress                | 136         | 12,8%         |
| Breech                         | 22          | 2,1%          |
| Twins                          | 28          | 2,6%          |
| Malpresentation                | 41          | 3,9%          |
| CPD                            | 90          | 8,5%          |
| Urgent or Emergency CS         | 50          | 4,7%          |
| Others                         | 41          | 3,9%          |
| <b>Total number of CS</b>      | <b>1060</b> | <b>100,0%</b> |

The management of the women with previous CS is shown in Fig 1. During the study there were 519 (17.2%) women with one or more previous CS. Among them, 153 (29.5%) had an elective pre-labour CS while the rest (70.5%) went into labour spontaneously. None of these women were induced. Among those who entered labour spontaneously, 71 (19,4%) had a SVD, while 295 (80.6%) had a CS. The indication recorded for the CS was “previous CS” in 97,4%

of the women who had a pre-labour CS and 90,5% of the women who went into labour spontaneously (Figure 1).

More than 40% of all CS in the hospital occurred in Groups 1 and 3. Since the CS rate was particularly high for Group 1 (27,7%) and Group 3 (15,2%), we analyzed deeply the indication for CS in these 2 groups (Figure 2) The majority of them were performed for dystocia (44,3% in Group 1; 55,1% in Group 3).

We registered two maternal deaths (one in Group 1 and one in Group 5) and 152 perinatal deaths (5%) of which 78 (2,6%) were stillbirth and 74 (2,5%) were neonatal deaths. About 70% of all perinatal deaths occurred in groups 1 (37 deaths), group 3 (29 deaths) and 10 (39 deaths).

We analyzed 220 cases of severe neonatal outcome (stillbirth, neonatal deaths and live birth with Apgar score < 7 after 5 minutes) by mode of delivery using the Robson Classification as shown in Table 5. Major contribution to severe neonatal outcome was given by Group 1 (27.7%), Group 10 (24.5%) and Group 3 (19,1%). Considering the incidence in each category, the groups with the highest severe neonatal outcome rate were Group 6 (33.3%), Group 10 (29%) and Group 7 (28,1%) indicating a high risk for newborn in breech deliveries.

The incidence of severe neonatal outcome was similar when analyzed by mode of delivery. Majority of adverse neonatal outcome in these groups occurred performing SVD.

Table 5: Distribution of severe neonatal outcomes stratified by Robson Groups.

|   | Severe neonatal outcomes/women in group | % of Severe neonatal outcomes | Relative contribution of group to the overall severe neonatal outcomes | Proportion of Severe neonatal outcome delivered by SVD* / total SVD |       | Proportion of Severe neonatal outcome delivered by OVD** / total OVD |       | Proportion of Severe neonatal outcome delivered by CS / total CS |       |
|---|-----------------------------------------|-------------------------------|------------------------------------------------------------------------|---------------------------------------------------------------------|-------|----------------------------------------------------------------------|-------|------------------------------------------------------------------|-------|
|   |                                         |                               |                                                                        |                                                                     |       |                                                                      |       |                                                                  |       |
| 1 | 61/1128                                 | 5,4%                          | 27,7%                                                                  | 43/799                                                              | 5,4%  | 1/20                                                                 | 5,0%  | 17/309                                                           | 5,5%  |
| 2 | 9/56                                    | 16,1%                         | 4,1%                                                                   | 7/19                                                                | 36,8% | 0/2                                                                  | 0,0%  | 2/35                                                             | 5,7%  |
| 3 | 42/974                                  | 4,3%                          | 19,1%                                                                  | 27/818                                                              | 3,3%  | 1/9                                                                  | 11,1% | 14/147                                                           | 9,5%  |
| 4 | 8/45                                    | 17,8%                         | 3,6%                                                                   | 7/20                                                                | 35,0% | -                                                                    | -     | 1/25                                                             | 4,0%  |
| 5 | 15/463                                  | 3,2%                          | 6,8%                                                                   | 1/58                                                                | 1,7%  | 0/1                                                                  | 0,0%  | 14/404                                                           | 3,5%  |
| 6 | 7/21                                    | 33,3%                         | 3,2%                                                                   | 6/8                                                                 | 75,0% | -                                                                    | -     | 1/13                                                             | 7,7%  |
| 7 | 9/32                                    | 28,1%                         | 4,1%                                                                   | 7/16                                                                | 43,8% | -                                                                    | -     | 2/16                                                             | 12,5% |

|              |                 |             |               |                 |             |             |             |                |             |
|--------------|-----------------|-------------|---------------|-----------------|-------------|-------------|-------------|----------------|-------------|
| 8            | 10/77           | 13,0%       | 4,5%          | 4/29            | 13,8%       | -           | -           | 6/48           | 12,5%       |
| 9            | 5/30            | 16,7%       | 2,3%          | -               |             | -           | -           | 5/30           | 16,7%       |
| 10           | 54/186          | 29,0%       | 24,5%         | 47/153          | 30,7%       | -           | -           | 7/33           | 21,2%       |
| <b>Total</b> | <b>220/3012</b> | <b>7,3%</b> | <b>100,0%</b> | <b>149/1920</b> | <b>7,8%</b> | <b>2/32</b> | <b>6,3%</b> | <b>69/1060</b> | <b>6,5%</b> |

\* SVD: simple vaginal delivery as a final mode of delivery

\*\* OVD: operative vaginal delivery

We conducted a descriptive analysis on a subset of women who underwent CS during the 2015 study period. Information on who performed the CS and its indication was available for 574 of 616 (93.1%) CS conducted. Most of the CS were performed by a Medical Doctor (66,6%; 382) while 25.8% (148) were conducted by an Assistant Medical Officer, and 7.7% (44) by a gynecologist. This distribution remains when stratifying by Robson groups and by indication of CS (See Appendix).

## Discussion

Our analysis of 3012 deliveries in a rural District Hospital in Tanzania using the Robson classification showed a 35% overall CS rate in an obstetric population of about 90% in Robson groups 1 through 5. These groups are, arguably, low-risk women but present high CS rates such as 27.4% and 15.1% in Group 1 and Group 3, respectively, whom are women at term with a single fetus in cephalic presentation without a previous CS who have entered labour spontaneously.

High CS rates have been reported in other studies in Tanzania[23, 26] (31% in Muhimbili Hospital, 35% in Kilimangiaro Christian Medical Center) probably because of the role of a referral hospital to target high risk pregnancy. This hypothesis could be confirmed by the higher CS rate in women referred from other facilities (63,7% in our study). Sørbye described this situation in KCMC[27] comparing patients referred and self-referred, having a CS rate of 55% and 26,9% respectively. However the referral system seems to have a poor role on our context since only 5,6% of the women were referred (vs 20% in Sørbye study).

Nilsen et al.[26] hypothesizes that poor quality of care at dispensaries and health centers level contributes excessively to raise the number of preventable CS in women who are referred late and in critical condition so at arrival an emergency CS is the only possible action[28]. In addition, several studies highlight the inadequacy of obstetric and neonatal care services at primary level in Tanzania[29, 30, 31]. Kruk et al. in a 2009 study conducted in the Kusulu

district[32] shows that 42.2% of women who give birth in peripheral units bypassed the nearest services (dispensaries) to go to higher level facilities (health centers), governmental or private facilities. 61.4% of women giving birth at home had a government dispensary in the village, but chose not to go there for the delivery.

Studies conducted by Straneo et al. in Tosamaganga catchment area showed high rates of institutional birth coverage, probably facilitated by the high health facility density[33]. But parallel to this, a conflict between coverage and quality of delivery care has been registered, with poorest women accessing lower level health services for delivery, which offer worse quality of care, due to limited caseloads and poor staffing[34].

Comparing the study population according the Robson Classification with other similar settings, Tosamaganga Hospital shows a bigger size of Group 5 (15,4% vs 8,8% in the population of Muhimbili Hospital 2000-2011) and a smaller size of preterm births (6.2% vs 14,6%), while similar is the size of Group 2 and 4 confirming probably the low induction rate in both contexts.

We analyzed data according to the interpretation guidelines published by WHO[25, 35] (Table 6).

Table 6: Interpretation of the Robson Classification

|                           |                                                                                                                                                                                                                                                                                                                                                                                                                                                                                                                                                                                                                                                                                                                                                                                                                                                                                                                                                                                                                                                                                                                                                                                                                            |
|---------------------------|----------------------------------------------------------------------------------------------------------------------------------------------------------------------------------------------------------------------------------------------------------------------------------------------------------------------------------------------------------------------------------------------------------------------------------------------------------------------------------------------------------------------------------------------------------------------------------------------------------------------------------------------------------------------------------------------------------------------------------------------------------------------------------------------------------------------------------------------------------------------------------------------------------------------------------------------------------------------------------------------------------------------------------------------------------------------------------------------------------------------------------------------------------------------------------------------------------------------------|
| <b>Quality of data</b>    | <ul style="list-style-type: none"> <li>The CS rate of the group is 100% signifying a good quality of data</li> </ul>                                                                                                                                                                                                                                                                                                                                                                                                                                                                                                                                                                                                                                                                                                                                                                                                                                                                                                                                                                                                                                                                                                       |
| <b>Type of population</b> | <ul style="list-style-type: none"> <li>The size of Groups 1 + 2 (39.5%) is within the expected range. However, the ratio of the size of Group 1 versus Group 2 is very high (20.1). In the WHO Multicountry Study reference population (population in the WHO study with relatively low CS rates and, at the same time, with good outcomes of labour and childbirth), this ratio was found to be 6.3[25, 36]. Similarly, the ratio of the size of Group 3 versus Group 4 is 21.6; very high compared with the 6.3 in the WHO study[25, 36]. Both high rates probably indicate the need to increase inductions in these groups of women (term with singleton fetus in cephalic presentation) or even not performing sufficient pre-labour CS. This is consistent with the high CS rates found in groups 1 and 3, and our data on stillbirth and neonatal deaths. Despite being the lower risk groups, of the total 152 perinatal deaths during the study period, 37 (24%) and 29 (19%) occurred in Groups 1 and 3, respectively. Only group 10 had a higher number of perinatal deaths with 39 (25.7%) but this is a high risk group with the women with singleton pregnancies in cephalic presentation preterm.</li> </ul> |

|                               |                                                                                                                                                                                                                                                                                                                                                                                                                                                                                                                                                                                                                                                                                                                                                                                                                                                                                                                                                                                                                                                                                                                                                                                                                                                                                                                                                                                                                                                                                                                                                                                                                                                                                                                                                                                                                                                                                                                                                                                                                                                                                                                                                                                                                                                 |
|-------------------------------|-------------------------------------------------------------------------------------------------------------------------------------------------------------------------------------------------------------------------------------------------------------------------------------------------------------------------------------------------------------------------------------------------------------------------------------------------------------------------------------------------------------------------------------------------------------------------------------------------------------------------------------------------------------------------------------------------------------------------------------------------------------------------------------------------------------------------------------------------------------------------------------------------------------------------------------------------------------------------------------------------------------------------------------------------------------------------------------------------------------------------------------------------------------------------------------------------------------------------------------------------------------------------------------------------------------------------------------------------------------------------------------------------------------------------------------------------------------------------------------------------------------------------------------------------------------------------------------------------------------------------------------------------------------------------------------------------------------------------------------------------------------------------------------------------------------------------------------------------------------------------------------------------------------------------------------------------------------------------------------------------------------------------------------------------------------------------------------------------------------------------------------------------------------------------------------------------------------------------------------------------|
|                               | <ul style="list-style-type: none"> <li>• The size of Groups 3 + 4 is 33.9%. Since Tanzania have a high fertility rate, we were expecting a higher number of multiparous. This can be explained by a very high size of Group 5 (15.4%) with a CS rate of 87%, which contributes to about 38% of all CS conducted in the hospital.</li> <li>• The size Groups 6 + 7 is 1.6% which is below the expected range for breeches. Moreover the ratio of Group 6/Group 7 is 0.5 is unusual since breeches are more frequent in nulliparas than multiparas. This could indicate errors in data collection due potentially to some misclassification of nulliparous women with breech presentation under Group 1.</li> <li>• The size of Group 10 is 6.2% slightly higher than that proposed by Robson (5%) and that found in the WHO Study (4.2%). Even if Tosamaganga is a referral hospital, only 168 deliveries (5,6%) were referred of which 107 (63,7%) delivered by CS. For this reason, we consider that the higher size of group 8 and 10 cannot be justified by a particularly high risk population.</li> <li>• Malnutrition and other concurrent diseases could have caused growth retardation and errors in pregnancy dating based on neonatal weight.</li> </ul>                                                                                                                                                                                                                                                                                                                                                                                                                                                                                                                                                                                                                                                                                                                                                                                                                                                                                                                                                                              |
| <b>Caesarean section rate</b> | <ul style="list-style-type: none"> <li>• In all groups, the CS rates are higher than the expected range[25, 36].</li> <li>• It has been proposed that CS rates in Group 1 of about 10% are achievable. However, the high ratio of Group 1 versus Group 2 mentioned above may be responsible for the high CS rate in this group (27.4%). If insufficient number of women are induced or have a necessary pre-labour CS, it is more likely than these women will need a CS at a later stage of labour. In addition, the high CS rate in Group 2 is not caused by the size of Group 2b (pre-labour CS, only 0.8% of the population), but mainly by a very low size of Group 2a (1.1% of the population) and by the poor success for induction with a consequent high C/S rate also in this group (34.4%). Similar arguments apply to Group 3 and 4. The high CS rate in Group 4 (55,5%) is not justified by the high size of Group 4b (representing only 0,8% of the population) but by the small size of Group 4a (only 0.7% of the population). Particularly in Group 1 and Group 3, a large number of CS were performed with the diagnosis of dystocia. This could suggest a poor quality of diagnosis of dystocia and sub-optimal management of the active phase of labor.</li> <li>• The very high CS rate in Group 5 (87.2%) is not justified by the proportion of women with 2 or more CS (Group 5.2) who represent one-third of the population of this group. CS rates in women with one (group 5.1) and two or more CS (group 5.2) are both high 83.2% and 97%, respectively, indicating the common practice to perform C/S in women with previous scar. These rates contrast markedly with the 50-60% rates considered appropriately by Robson guideline and the 74.4% found in the WHO Study[25, 36]. Nevertheless, an assessment of the hospital capacity to offer safe Trial of Labour after CS (TOLAC) would be crucial before recommending more women to be offered a trial of labour. Vaginal birth after cesarean (VBAC) was minimally practiced probably because of the inadequate number of midwives to attend the women in labour. Moreover the lack of information around the previous caesarean delivery (how was</li> </ul> |



|  |                                                                                                                                                                                                                                                                                                                                                                                                                                                                                                                                                                                                                                                                                                                                                              |
|--|--------------------------------------------------------------------------------------------------------------------------------------------------------------------------------------------------------------------------------------------------------------------------------------------------------------------------------------------------------------------------------------------------------------------------------------------------------------------------------------------------------------------------------------------------------------------------------------------------------------------------------------------------------------------------------------------------------------------------------------------------------------|
|  | <p>performed and complication occurred) may have increased the fear of doctors to offer TOLAC.</p> <ul style="list-style-type: none"> <li>• Looking at the higher risk groups, CS rate in Group 8 is within the expected range, while the CS rate in Group 10 is lower than expected, probably indicating a high rate of spontaneous preterm labour or a high incident of low birth weight (since newborn weight was used as a proxy for gestational age)[25, 36].</li> <li>• Considering the contribution of the groups to the overall CS rate, Group 1, 2 and 5 represent 70.6% of all CS, higher than the expected, and among this, Group 5 contribute for 38.1% indicating, as already mentioned, a very high C/S rate in the previous years.</li> </ul> |
|--|--------------------------------------------------------------------------------------------------------------------------------------------------------------------------------------------------------------------------------------------------------------------------------------------------------------------------------------------------------------------------------------------------------------------------------------------------------------------------------------------------------------------------------------------------------------------------------------------------------------------------------------------------------------------------------------------------------------------------------------------------------------|

Among 152 perinatal deaths, 78 were stillbirth. The highest incidence of severe neonatal outcome was recorded in Group 6, 7 and 10, therefore breech deliveries and preterm deliveries were the most at risk in our hospital.

As has been shown by other studies in similar setting[37], a higher risk for adverse neonatal outcome in breech vaginal deliveries compared with breech CS has been registered in Tosamaganga Hospital, suggesting sub-optimal management of breech presentation and the need for training

In addition, a good antenatal care program would help women to approach the facility earlier and would prevent risk factors for preterm birth, report and manage pregnancies with fetuses in breech presentation and also decrease the number of intrapartum deaths and macerated fetuses.

In Tosamaganga hospital most of the CS were performed by in charge of the delivery room, namely the Medical Doctor (MD) and the Assistant Medical Doctor (AMO), which cover all duty calls. The Gynecologist was involved in case of emergency and complicated elective or intrapartum CS. In all Robson categories, the highest CS rate was performed by the MD. Again, this suggests the need for an obstetric and gynecological training for the staff and a better supervision by the gynecologist. Nyamtema et al. analyzed the work of MD, AMD and midwives in 10 rural health centers in Tanzania[38]. Based on the Tanzanian national guidelines and WHO recommendations[39], 37% of CS were considered unjustified and potentially preventable. After a staff training program and close supervision, the proportion of unjustified CS decreased from 30% to 17% in HCs and from 37% to 20% in hospitals[38].

### *Strengths and limitations*

This study uses data from a rural setting, giving the opportunity to compare with other contexts in the country. The availability of outcome data and the indication for CS allowed a more contextualized interpretation the interpretation of CS rates in each group. Moreover, the availability of data on who performed the CS gives the possibility to address appropriately any improvement interventions. There are a number of limitations to this study. The data were derived from handwritten records and some information may not be accurate. Because of missing data we included in the study two different period of 2014 and 2015, therefore there is discontinuity in data collection. We have chosen to combine the two periods to increase the sample and not have seasonal differences. Some variables were not available in patient's charts and registers (i.e. length of labour, difference between Macerated Stillbirth (MSB) and Fresh Stillbirth (FSB)). Perinatal mortality can be underreported because Early neonatal deaths occurred after the discharge were not captured. Lastly, since the determination of gestational age was not reliable, we used birth weight as proxy.

### **Conclusion**

A high CS rate was registered in Tosamaganga Hospital although the obstetric population attended was not considered of particular high risk for a referral hospital. The analysis of the data using the Robson classification showed that Groups 1 and 3 (women at term with a single fetus in cephalic presentation who entered labour spontaneously) were larger than anticipated and presented very high CS rates. The large size of these groups and the high CS rates combined with the stillbirth and neonatal mortality rates seen in the hospital, may indicate insufficient induction rates and the need to provide timely referral so that women reach to the hospital earlier before their condition is too critical.

Efforts to improve care and outcomes should invest in the training of medical and nursing staff to improve the management of labour, with a correct use of the partogram and in particular for a judicious use of oxytocin augmentation for the management of prolonged labor. Training on management of breeches and TOLAC would also be a priority to improve quality of intrapartum care in the hospital.

**Figure 1.** Management of women with one or more previous CS during the study period.

**Figure 2.** Indication for CS in Group 1 and Group 3.

1  
2  
3 **Acknowledgment:** We want to thank the hospital management and Maternity Unit staff for  
4 their support for the realization of the study.  
5  
6  
7

8 **Contributors:** FT, AB and GP contributed to the idea and design of the study. BA collected  
9 data. FT analyzed the data. FT and BA drafted the manuscript. DM, GP and GFT did the  
10 supervision and provided mentorship. APB assisted in the literature research and in the revision  
11 of the manuscript. All authors read and approved the final version of the manuscript.  
12  
13  
14

15  
16  
17 **Funding:** This research received no specific grant from any funding agency in the public,  
18 commercial or not-for-profit sectors  
19  
20

21  
22 **Competing interests:** None  
23  
24

25  
26 **Patient consent:** Not required  
27  
28

29 **Ethics approval:** This study was approved by the hospital review board, who, in agreement  
30 with the "Declaration of Helsinki", waived the need for patient written consent, given the  
31 retrospective nature of the study and the collection of anonymized data.  
32  
33  
34

35  
36 **Data sharing statement:** Data essential for conclusion are included in this manuscript.  
37 Additional data can be obtained from the corresponding author on reasonable request.  
38  
39

40  
41 **Disclaimer:** The views expressed in this publication are the sole responsibility of the authors  
42 and do not necessarily reflect the views of the affiliated organizations.  
43  
44  
45  
46  
47  
48  
49  
50  
51  
52  
53  
54  
55  
56  
57  
58  
59  
60

## References

- 1 Betran AP, Torloni MR, Zhang JJ, et al. WHO Statement on Caesarean Section Rates. *BJOG*. 2016;123(5):667–670 doi:10.1111/1471-0528.13526 [published Online First: 22 July 2015]
- 2 Bailey PE, Paxton A. Program note. Using UN process indicators to assess needs in emergency obstetric services. *Int J Gynaecol Obstet* 2002;76:299-305
- 3 Thomas S, Meadows J, McQueen KA. Access to Cesarean Section Will Reduce Maternal Mortality in Low-Income Countries: A Mathematical Model. *World J Surg* 2016;40:1537–1541. doi:10.1007/s00268-016-3479-0.
- 4 United Nations General Assembly. Transforming our world: The 2030 Agenda for Sustainable Development. 2015. Available from: [https://www.un.org/ga/search/view\\_doc.asp?symbol=A/RES/70/1&Lang=E](https://www.un.org/ga/search/view_doc.asp?symbol=A/RES/70/1&Lang=E) [Accessed January 2019].
- 5 Villar J, Carroli G, Zavaleta N, et al. Maternal and neonatal individual risks and benefits associated with caesarean delivery: multicentre prospective study. *BMJ* 2007;335:102.
- 6 Kennare R, Tucker G, Heard A, et al. Risks of adverse outcomes in the next birth after a first cesarean delivery. *Obstet Gynecol*. 2007;109(2 Pt 1):270-6.
- 7 Daltveit AK, Tollånes MC, Pihlstrøm H, et al. Cesarean delivery and subsequent pregnancies. *Obstet Gynecol*. 2008;111(6):1327-34. doi:10.1097/AOG.0b013e3181744110
- 8 Allen VM1, O'Connell CM, Farrell SA, et al. Economic implications of method of delivery. *Am J Obstet Gynecol*. 2005;193(1):192-7
- 9 Betrán AP, Ye J, Moller AB, et al. The Increasing Trend in Caesarean Section Rates: Global, Regional and National Estimates: 1990-2014. *PLoS One*. 2016;11(2):e0148343. doi:10.1371/journal.pone.0148343.
- 10 Vogel JP, Betrán AP, Vindevoghel N, et al. Use of the Robson classification to assess caesarean section trends in 21 countries: a secondary analysis of two WHO multicountry surveys. *Lancet Glob Health*. 2015;3(5):e260-70. doi:10.1016/S2214-109X(15)70094-X [published Online First: 9 April 2015].
- 11 WHO. Appropriate technology for birth. *Lancet* 1985;2:436–7.
- 12 Ghahiri A, Khosravi M. Maternal and neonatal morbidity and mortality rate in caesarean section and vaginal delivery. *Adv Biomed Res*. 2015;4:193. doi:10.4103/2277-9175.166154 [published Online: 28 September 2015].
- 13 Ye J, Zhang J, Mikolajczyk R, et al. Association between rates of caesarean section and maternal and neonatal mortality in the 21st century: a worldwide population-based ecological

1  
2  
3 study with longitudinal data. *BJOG*. 2016;123(5):745-53. doi:10.1111/1471-0528.13592  
4 [published Online First: 24 August 2015].

5  
6 14 Vogel JP, Souza JP, Mori R, et al. Maternal complications and perinatal mortality: findings  
7 of the World Health Organization Multicountry Survey on Maternal and Newborn Health.  
8 *BJOG*. 2014;121(Suppl 1):76-88. doi:10.1111/1471-0528.12633.  
9

10  
11 15 Ye J, Betrán AP, Guerrero Vela M, et al. Searching for the optimal rate of medically  
12 necessary cesarean delivery. *Birth*. 2014;41(3):237-44. doi:10.1111/birt.12104. [published  
13 Online First: 11 April 2014].  
14

15  
16 16 Betran AP, Torloni MR, Zhang J, et al. What is the optimal rate of caesarean section at  
17 population level? A systematic review of ecologic studies. *Reprod Health*. 2015;12:57.  
18 doi:10.1186/s12978-015-0043-6 [Published online 21 June 2015].  
19

20  
21 17 Betran AP, Torloni MR, Zhang JJ, et al; WHO Statement on Caesarean Section Rates.  
22 *BJOG*. 2016;123(5):667-670. doi:10.1111/1471-0528.13526  
23

24  
25 18 Torloni MR, Betran AP, Souza JP, et al. Classifications for cesarean section: a systematic  
26 review. *PLoS One*. 2011;6(1):e14566. doi:10.1371/journal.pone.0014566.  
27

28  
29 19 FIGO Working Group On Challenges In Care Of Mothers And Infants During Labour And  
30 Delivery. Best practice advice on the 10-Group Classification System for cesarean deliveries.  
31 *Int J Gynaecol Obstet*. 2016;135(2):232-233. doi:10.1016/j.ijgo.2016.08.001. [published  
32 Online 22 August 2016].  
33

34  
35 20 Robson MS, Classification of Caesarean sections. *Fetal and Maternal Medicine Review*  
36 2001;12(01):23-39  
37

38  
39 21 WHO. Physical status: the use and interpretation of anthropometry. Technical Report Series  
40 No. 854 Available from:  
41 [https://apps.who.int/iris/bitstream/handle/10665/37003/WHO\\_TRS\\_854.pdf?sequence=1](https://apps.who.int/iris/bitstream/handle/10665/37003/WHO_TRS_854.pdf?sequence=1)  
42 [Accessed March 2019].  
43

44  
45 22 Tura AK, Pijpers O, de Man M, et al. Analysis of caesarean sections using Robson 10-group  
46 classification system in a university hospital in eastern Ethiopia: a cross-sectional study. *BMJ*  
47 *Open*. 2018;8(4):e020520. doi:10.1136/bmjopen-2017-020520.  
48

49  
50 23 Litorp H, Kidanto HL, Nystrom L, et al. Increasing caesarean section rates among low-risk  
51 groups: a panel study classifying deliveries according to Robson at a university hospital in  
52 Tanzania. *BMC Pregnancy Childbirth*. 2013;13:107. doi:10.1186/1471-2393-13-107.  
53

54  
55 24 Hanson C, Betrán AP, Opondo C, et al. Trends in caesarean section rates between 2007 and  
56 2013 in obstetric risk groups inspired by the Robson classification: results from population-  
57  
58  
59  
60

1  
2  
3 based surveys in a low-resource setting. *BJOG*. 2019;126(6):690-700. doi:10.1111/1471-  
4 0528.15534. [published Online First 29 November 2018].

5  
6 25 WHO. Robson Classification: Implementation Manual. Geneva: World Health  
7 Organization; 2017. Licence: CC BY-NC-SA 3.0 IGO. Available from:  
8 [https://apps.who.int/iris/bitstream/handle/10665/259512/9789241513197-](https://apps.who.int/iris/bitstream/handle/10665/259512/9789241513197-eng.pdf?sequence=1)  
9 [eng.pdf?sequence=1](https://apps.who.int/iris/bitstream/handle/10665/259512/9789241513197-eng.pdf?sequence=1) [Accessed March 2019].

10  
11  
12 26 Nilsen C, Østbye T, Daltveit AK, et al. Trends in and socio-demographic factors associated  
13 with caesarean section at a Tanzanian referral hospital, 2000 to 2013. *Int J Equity Health*.  
14 2014;13:87. doi:10.1186/s12939-014-0087-1.

15  
16 27 Sørbye IK, Vangen S, Oneko O, et al. Caesarean section among referred and self-referred  
17 birthing women: a cohort study from a tertiary hospital, northeastern Tanzania. *BMC*  
18 *Pregnancy Childbirth*. 2011;11:55. doi: 10.1186/1471-2393-11-55.

19  
20 28 Betrán AP, Temmerman M, Kingdon C, et al. Interventions to reduce unnecessary caesarean  
21 sections in healthy women and babies. *Lancet*. 2018;392(10155):1358-1368.  
22 doi:10.1016/S0140-6736(18)31927-5.

23  
24 29 National Bureau of Statistics (NBS) [Tanzania] and Macro International Inc.. 2007.  
25 Tanzania Service Provision Assessment Survey 2006. Dar es Salaam, Tanzania: National  
26 Bureau of Statistics and Macro International Inc. Available from:  
27 <https://dhsprogram.com/pubs/pdf/SPA12/SPA12.pdf> [Accessed March 2019].

28  
29 30 Leonard KL, Masatu MC. Variations in the quality of care accessible to rural communities  
30 in Tanzania. *Health Aff (Millwood)*. 2007;26(3):w380-92 doi:10.1377/hlthaff.26.3.w380.

31  
32 31 Gilson L, Alilio M, Heggenhougen K. Community satisfaction with primary health care  
33 services: an evaluation undertaken in the Morogoro region of Tanzania. *Soc Sci Med*.  
34 1994;39(6):767-80.

35  
36 32 Kruk ME, Mbaruku G, McCord CW, et al. Bypassing primary care facilities for childbirth:  
37 a population-based study in rural Tanzania. *Health Policy Plan*. 2009;24(4):279-88.  
38 doi:10.1093/heapol/czp011 [published Online First 20 March 2009].

39  
40 33 Straneo M, Fogliati P, Pellis I, et al. On the way to universal coverage of maternal services  
41 in Iringa rural District in Tanzania. Who is yet to be reached? *Afr Health Sci*. 2016;16(2):420-8.  
42 doi:10.4314/ahs.v16i2.10.

43  
44 34 Straneo M, Fogliati P, Azzimonti G, et al. Where do the rural poor deliver when high  
45 coverage of health facility delivery is achieved? Findings from a community and hospital  
46 survey in Tanzania. *PLoS One*. 2014;9(12):e113995. doi:10.1371/journal.pone.0113995.

- 1  
2  
3 35 WHO. Robson Classification: Example of Robson Report Table with Interpretation.  
4 Geneva: World Health Organization; 2017. Licence: CC BY-NC-SA 3.0 IGO. Available from:  
5 <https://apps.who.int/iris/bitstream/handle/10665/259513/WHO-RHR-17.22->  
6 [eng.pdf?sequence=1](https://apps.who.int/iris/bitstream/handle/10665/259513/WHO-RHR-17.22-) [Accessed March 2019].  
7  
8  
9  
10 36 Souza JP, Betran AP, Dumont A, et al. A global reference for caesarean section rates (C-  
11 Model): a multicountry cross-sectional study. *BJOG*. 2016;123(3):427-36. doi:10.1111/1471-  
12 0528.13509. [published Online First 10 August 2015].  
13  
14 37 Högberg U, Claeson C, Krebs L, et al. Breech delivery at a University Hospital in Tanzania.  
15 *BMC Pregnancy Childbirth*. 2016;16(1):342.  
16  
17 38 Nyamtema A, Mwakatundu N, Dominico S, et al. Increasing the availability and quality of  
18 caesarean section in Tanzania. *BJOG*. 2016;123(10):1676-82. doi:10.1111/1471-0528.14223.  
19 [published Online First 22 July 2016].  
20  
21 39 WHO. Managing complications in pregnancy and childbirth: a guide for midwives and  
22 doctors – 2nd ed. Geneva: World Health Organization; 2017. Licence: CC BY-NC-SA 3.0  
23 IGO. Available from:  
24 <https://apps.who.int/iris/bitstream/handle/10665/255760/9789241565493->  
25 [eng.pdf?sequence=1](https://apps.who.int/iris/bitstream/handle/10665/255760/9789241565493-) [Accessed March 2019].  
26  
27  
28  
29  
30  
31  
32  
33  
34  
35  
36  
37  
38  
39  
40  
41  
42  
43  
44  
45  
46  
47  
48  
49  
50  
51  
52  
53  
54  
55  
56  
57  
58  
59  
60

1  
2  
3  
4  
5  
6  
7  
8  
9  
10  
11  
12  
13  
14  
15  
16  
17  
18  
19  
20  
21  
22  
23  
24  
25  
26  
27  
28  
29  
30  
31  
32  
33  
34  
35  
36  
37  
38  
39  
40  
41  
42  
43  
44  
45  
46  
47  
48  
49  
50  
51  
52  
53  
54  
55  
56  
57  
58  
59  
60

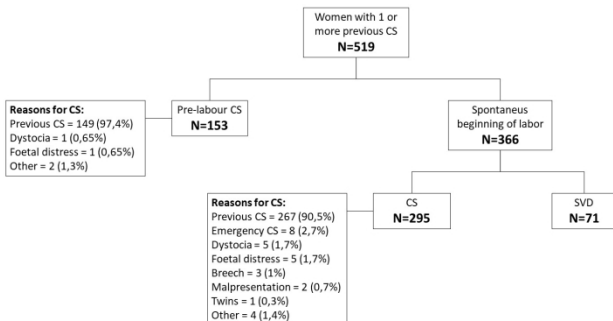

Management of women with one or more previous CS during the study period.

602x338mm (96 x 96 DPI)



1  
2  
3  
4  
5  
6  
7  
8  
9  
10  
11  
12  
13  
14  
15  
16  
17  
18  
19  
20  
21  
22  
23  
24  
25  
26  
27  
28  
29  
30  
31  
32  
33  
34  
35  
36  
37  
38  
39  
40  
41  
42  
43  
44  
45  
46  
47  
48  
49  
50  
51  
52  
53  
54  
55  
56  
57  
58  
59  
60

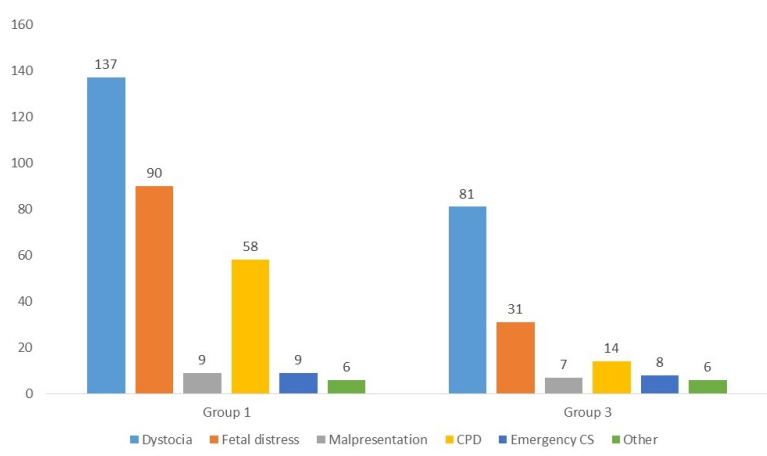

Indication for CS in Group 1 and Group 3.

338x190mm (96 x 96 DPI)

APPENDIX

Appendix 1: Distribution of CS among health professionals stratified in the Robson Classification.

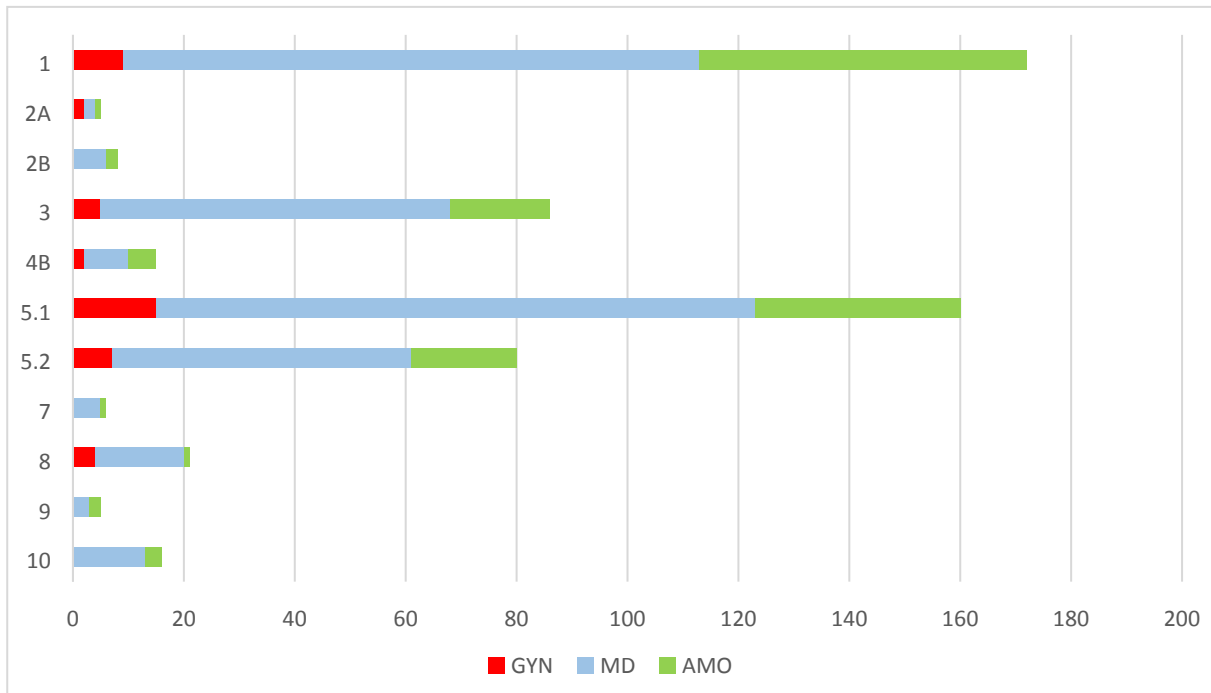

Appendix 2: Distribution of CS among health professionals according to indication for CS

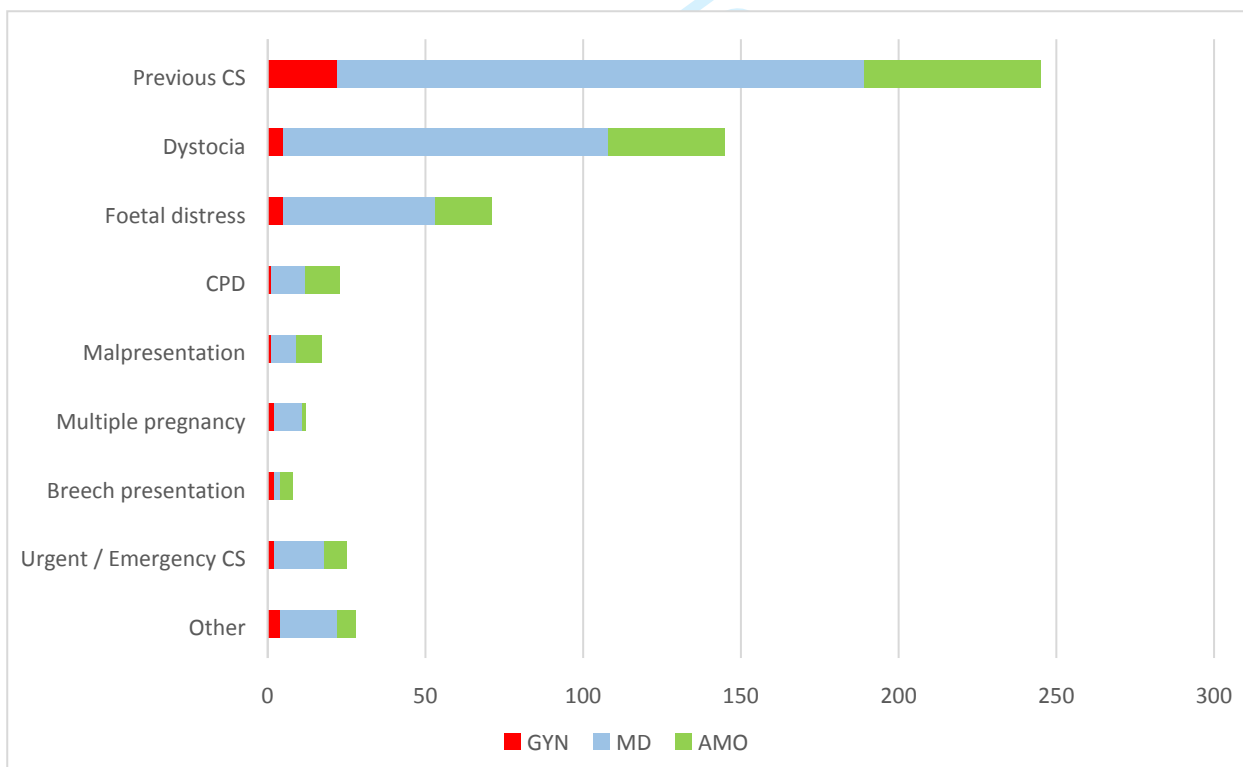

## Robson Classification System applied in a rural District Hospital in Tanzania

STROBE Statement—Checklist of items that should be included in reports of *cross-sectional studies*

|                              | Item No | Recommendation                                                                                                                                                                                    | Comments       |
|------------------------------|---------|---------------------------------------------------------------------------------------------------------------------------------------------------------------------------------------------------|----------------|
| <b>Title and abstract</b>    | 1       | (a) Indicate the study's design with a commonly used term in the title or the abstract                                                                                                            | P. 2           |
|                              |         | (b) Provide in the abstract an informative and balanced summary of what was done and what was found                                                                                               | P. 2           |
| <b>Introduction</b>          |         |                                                                                                                                                                                                   |                |
| Background/rationale         | 2       | Explain the scientific background and rationale for the investigation being reported                                                                                                              | P. 5           |
| Objectives                   | 3       | State specific objectives, including any prespecified hypotheses                                                                                                                                  | P. 5           |
| <b>Methods</b>               |         |                                                                                                                                                                                                   |                |
| Study design                 | 4       | Present key elements of study design early in the paper                                                                                                                                           | P. 5           |
| Setting                      | 5       | Describe the setting, locations, and relevant dates, including periods of recruitment, exposure, follow-up, and data collection                                                                   | Pp. 5,6        |
| Participants                 | 6       | (a) Give the eligibility criteria, and the sources and methods of selection of participants                                                                                                       | P. 5           |
| Variables                    | 7       | Clearly define all outcomes, exposures, predictors, potential confounders, and effect modifiers. Give diagnostic criteria, if applicable                                                          | Pp. 6,7        |
| Data sources/<br>measurement | 8*      | For each variable of interest, give sources of data and details of methods of assessment (measurement). Describe comparability of assessment methods if there is more than one group              | Pp. 6,7        |
| Bias                         | 9       | Describe any efforts to address potential sources of bias                                                                                                                                         | Pp. 5,6,7      |
| Study size                   | 10      | Explain how the study size was arrived at                                                                                                                                                         | P. 5           |
| Quantitative variables       | 11      | Explain how quantitative variables were handled in the analyses. If applicable, describe which groupings were chosen and why                                                                      | P. 6           |
| Statistical methods          | 12      | (a) Describe all statistical methods, including those used to control for confounding                                                                                                             | P. 5           |
|                              |         | (b) Describe any methods used to examine subgroups and interactions                                                                                                                               | P. 5           |
|                              |         | (c) Explain how missing data were addressed                                                                                                                                                       | P. 7           |
|                              |         | (d) If applicable, describe analytical methods taking account of sampling strategy                                                                                                                | Not applicable |
|                              |         | (e) Describe any sensitivity analyses                                                                                                                                                             | Not applicable |
| <b>Results</b>               |         |                                                                                                                                                                                                   |                |
| Participants                 | 13*     | (a) Report numbers of individuals at each stage of study—eg numbers potentially eligible, examined for eligibility, confirmed eligible, included in the study, completing follow-up, and analysed | Pp. 7,8        |
|                              |         | (b) Give reasons for non-participation at each stage                                                                                                                                              | P. 7           |
|                              |         | (c) Consider use of a flow diagram                                                                                                                                                                | -              |
| Descriptive data             | 14*     | (a) Give characteristics of study participants (eg demographic, clinical, social) and information on exposures and potential                                                                      | Table 1        |

|                          |     |                                                                                                                                                                                                              |                                                                      |
|--------------------------|-----|--------------------------------------------------------------------------------------------------------------------------------------------------------------------------------------------------------------|----------------------------------------------------------------------|
|                          |     | confounders                                                                                                                                                                                                  |                                                                      |
|                          |     | (b) Indicate number of participants with missing data for each variable of interest                                                                                                                          | Participant with incomplete data were not considered in the analysis |
| Outcome data             | 15* | Report numbers of outcome events or summary measures                                                                                                                                                         | Table 2, Table 5                                                     |
| Main results             | 16  | (a) Give unadjusted estimates and, if applicable, confounder-adjusted estimates and their precision (eg, 95% confidence interval). Make clear which confounders were adjusted for and why they were included | Not applicable                                                       |
|                          |     | (b) Report category boundaries when continuous variables were categorized                                                                                                                                    | Done                                                                 |
|                          |     | (c) If relevant, consider translating estimates of relative risk into absolute risk for a meaningful time period                                                                                             | -                                                                    |
| Other analyses           | 17  | Report other analyses done—eg analyses of subgroups and interactions, and sensitivity analyses                                                                                                               | Pp 8-11                                                              |
| <b>Discussion</b>        |     |                                                                                                                                                                                                              |                                                                      |
| Key results              | 18  | Summarise key results with reference to study objectives                                                                                                                                                     | P. 12                                                                |
| Limitations              | 19  | Discuss limitations of the study, taking into account sources of potential bias or imprecision. Discuss both direction and magnitude of any potential bias                                                   | P. 16                                                                |
| Interpretation           | 20  | Give a cautious overall interpretation of results considering objectives, limitations, multiplicity of analyses, results from similar studies, and other relevant evidence                                   | Table 6, p. 15                                                       |
| Generalisability         | 21  | Discuss the generalisability (external validity) of the study results                                                                                                                                        | P. 15                                                                |
| <b>Other information</b> |     |                                                                                                                                                                                                              |                                                                      |
| Funding                  | 22  | Give the source of funding and the role of the funders for the present study and, if applicable, for the original study on which the present article is based                                                | P. 18                                                                |

\*Give information separately for exposed and unexposed groups.

**Note:** An Explanation and Elaboration article discusses each checklist item and gives methodological background and published examples of transparent reporting. The STROBE checklist is best used in conjunction with this article (freely available on the Web sites of PLoS Medicine at <http://www.plosmedicine.org/>, Annals of Internal Medicine at <http://www.annals.org/>, and Epidemiology at <http://www.epidem.com/>). Information on the STROBE Initiative is available at [www.strobe-statement.org](http://www.strobe-statement.org).

# BMJ Open

## Analysis of Caesarean Section and neonatal outcome using the Robson classification in a rural district hospital in Tanzania

|                                 |                                                                                                                                                                                                                                                                                                                                                                                                                                                                                                                                                                                                                                                                                                                                                                               |
|---------------------------------|-------------------------------------------------------------------------------------------------------------------------------------------------------------------------------------------------------------------------------------------------------------------------------------------------------------------------------------------------------------------------------------------------------------------------------------------------------------------------------------------------------------------------------------------------------------------------------------------------------------------------------------------------------------------------------------------------------------------------------------------------------------------------------|
| Journal:                        | <i>BMJ Open</i>                                                                                                                                                                                                                                                                                                                                                                                                                                                                                                                                                                                                                                                                                                                                                               |
| Manuscript ID                   | bmjopen-2019-033348.R1                                                                                                                                                                                                                                                                                                                                                                                                                                                                                                                                                                                                                                                                                                                                                        |
| Article Type:                   | Original research                                                                                                                                                                                                                                                                                                                                                                                                                                                                                                                                                                                                                                                                                                                                                             |
| Date Submitted by the Author:   | 02-Oct-2019                                                                                                                                                                                                                                                                                                                                                                                                                                                                                                                                                                                                                                                                                                                                                                   |
| Complete List of Authors:       | Tognon, Francesca; Universita degli Studi di Padova Dipartimento di Medicina, Dipartimento di Salute della Donna e del Bambino; Cuamm Medici con l'Africa, Borghero, Angela; Cuamm Medici con l'Africa, Tosamaganga Council Designated Hospital<br>Putoto, G; Cuamm Medici con l'Africa<br>Maziku, Donald ; Tosamaganga Council Designated Hospital, Maternity Department<br>Torelli, Giovanni; Cuamm Medici con l'Africa, Tosamaganga Council Designated Hospital<br>Azzimonti, Gaetano; Cuamm Medici con l'Africa, Tosamaganga Council Designated Hospital<br>Betran, Ana Pilar; World Health Organization, UNDP/UNFPA/UNICEF/WHO/World Bank Special Programme of Research, Development and Research Training in Human Reproduction (HRP), Reproductive Health and Research |
| <b>Primary Subject Heading</b>: | Obstetrics and gynaecology                                                                                                                                                                                                                                                                                                                                                                                                                                                                                                                                                                                                                                                                                                                                                    |
| Secondary Subject Heading:      | Surgery                                                                                                                                                                                                                                                                                                                                                                                                                                                                                                                                                                                                                                                                                                                                                                       |
| Keywords:                       | 10-Group Classification System, Cesarean Section, Tanzania, Robson classification, Neonatal outcome                                                                                                                                                                                                                                                                                                                                                                                                                                                                                                                                                                                                                                                                           |
|                                 |                                                                                                                                                                                                                                                                                                                                                                                                                                                                                                                                                                                                                                                                                                                                                                               |

SCHOLARONE™  
Manuscripts

# Analysis of Caesarean Section and neonatal outcome using the Robson classification in a rural district hospital in Tanzania

**Authors:** Francesca Tognon<sup>1</sup>, Angela Borghero<sup>2</sup>, Giovanni Putoto<sup>3</sup>, Donald Maziku<sup>4</sup>, Giovanni Fernando Torelli<sup>2</sup>, Gaetano Azzimonti<sup>2</sup>, Ana Pilar Betrán<sup>5</sup>

<sup>1</sup> Department of Women's and Children's Health – University of Padua, Italy.

<sup>2</sup> Doctors with Africa CUAMM, Tanzania.

<sup>3</sup> Operational Research Unit, Doctors with Africa CUAMM, Padua, Italy

<sup>4</sup> St. John of the Cross Tosamaganga Hospital, Tanzania

<sup>5</sup> UNDP/UNFPA/UNICEF/WHO/World Bank Special Programme of Research, Development and Research Training in Human Reproduction (HRP), Department of Reproductive Health and Research, World Health Organization (WHO), Geneva, Switzerland

## Corresponding author:

Francesca Tognon

Department of Women's and Children's Health

Via Giustiniani 3, 35128 Padua, Italy

[francesca.tognon.1@phd.unipd.it](mailto:francesca.tognon.1@phd.unipd.it)

+39 3466128684

**Word count** (excluding title page, abstract, references, figures and tables): 4.101

## Abstract

**Objective:** Caesarean section (CS) rates have increased worldwide in recent decades. In 2015, the World Health Organization (WHO), proposed the use of the 10-group classification as a global standard for assessing, monitoring and comparing CS rates both within health care facilities over time, and between them. The aim of this study was to assess the pattern of CS rates according to the Robson classification and describe maternal and perinatal outcomes by group at the Tosamaganga Hospital in rural Tanzania.

**Design:** Observational retrospective study.

**Setting:** St. John of the Cross Tosamaganga Hospital, a referral centre in rural Tanzania.

**Participants:** 3012 women who gave birth in Tosamaganga Hospital from 1 January to 30 June 2014 and from 1 March to 30 November 2015.

**Results:** The overall CS rate was 35.2%, and about 90% of women admitted for labour were in Robson Groups 1 through 5. More than 40% of the CS carried out in the hospital were performed on nulliparous women at term with a single fetus in cephalic presentation (Groups 1 and 3), and the most frequent indication for the procedure was previous uterine scar (39.2%). The majority of severe neonatal outcomes were observed in Groups 1 (27.7%), 10 (24.5%) and 3 (19.1%).

**Conclusion:** We recorded a high CS rate in Tosamaganga Hospital, particularly in low-risk patients groups (Robson 1 and 3). Our Robson classification and neonatal outcomes analysis suggests the need to improve labour management at the hospital, and to provide timely referrals in order to prevent women from arriving there in critical conditions.

## Keywords

10-Group Classification System; Caesarean Section; Tanzania; Robson classification; Neonatal outcome;

## Strengths and limitations of this study

- Our study used data from a rural setting, that can be compared with analogous data obtained in other settings in the country.
- The availability of outcome data, indication and data on who performed the Caesarean Section made possible a more contextualized interpretation of Caesarean Section rates in each group.
- The combination of two different periods of 2014 and 2015 enlarged the sample size and allowed us to avoid seasonal bias.
- The data was collected from handwritten records, thus some of the information may not be accurate.
- Due to missing data, it was not possible to analyse the details of the Caesarean Section decision-making process.



## Introduction

Caesarean section (CS) is a lifesaving procedure performed when an urgent obstetric condition precludes vaginal delivery[1]. The CS rate is widely considered an important global indicator for measuring access to obstetric services[2] and safe and timely care for mothers and newborns. Ensuring access to CS is an essential strategy to reduce maternal mortality[3] in order to achieve the target of Sustainable Development Goal number , i.e. reducing the number of maternal deaths to less than 70 per 100,000 live births by 2030[4].

As surgical procedure, CS is associated with increased risk of maternal morbidity, including postpartum haemorrhage, blood transfusion, hysterectomy and even death, while a uterine scar can increase the risk of uterine rupture, placenta previa or placenta accreta in subsequent pregnancies[5-7]. These risks are higher in settings that lack access to safe surgery and/or the capacity to treat complications safely. Compared with vaginal delivery, CS also necessitates more health personnel and entails higher costs both for hospitals and for society[8]. Nevertheless, over the past three decades CS rates have increased steadily in many countries, especially middle- and high-income ones, a phenomenon that has become a major public health concern[9, 10]. In 1985, the World Health Organization (WHO) stated that “There is no justification for any region to have a caesarean section rate higher than 10–15%”. This statement was justified based on review of data mainly from northern European countries which had achieved good maternal and perinatal outcomes with that CS rate[11]. Numerous studies have analysed the relationship between the CS rate and maternal and neonatal mortality, attempting to define the optimal limit/range associated with minimum maternal and perinatal risks[12-15], but the multiple limitations in each of these approaches has limited the interpretation of results[16]. In 2015, a new WHO policy statement superseding the earlier one did not recommend any specific rate as “optimal”, recommending instead that “Every effort should be made to provide caesarean sections to women in need, rather than striving to achieve a specific rate”[17].

Nevertheless, the above-mentioned health and socio-economic impact as well as the unknown ecological and intergenerational consequences of the worldwide trend of increasing CS rate mean that it continues to be a widespread concern. The increase in CS deliveries is being seen not only in high- and middle-income countries, but also in low-income ones. Moreover, the increase has not been equally distributed across income or residency strata; in low-income countries, inequalities are exacerbated by the unnecessary overuse of CS in or among some facilities, settings or patients groups alongside others where the lack of access to the procedure leads to high levels of maternal and perinatal mortality[18].

Efforts have been made to devise effective strategies to reduce unnecessary CS. In order to better face this challenge, it is essential to study the population of women who undergo CS, to identify high-risk groups for poor outcomes, and to investigate the reasons for these trends in different groups and settings[19]. For many

1  
2  
3 decades, the lack of a standard and internationally-accepted CS classification system made it difficult to  
4 fully understand the growing trend and act upon it. The ten-group Robson classification system now  
5 recommended by WHO and the International Federation of Gynecology and Obstetrics (FIGO) for assessing,  
6 monitoring and comparing CS rates within healthcare facilities over time as well as between them[17, 20] is  
7 simple, clinically relevant, accountable, replicable and verifiable[21], all critical characteristics for such a  
8 system.  
9  
10  
11

12  
13 The aim of our work was to assess the pattern of CS rates according to the Robson classification and to  
14 describe maternal and perinatal outcomes by group in a rural district hospital in Tanzania. Based on these  
15 data, we propose potential strategies to address the overuse of CS procedures.  
16  
17  
18  
19  
20

## 21 **Methods**

### 22 **Design and participants**

23  
24  
25  
26  
27  
28  
29 This was an observational retrospective study conducted in a rural district hospital in Tanzania. We included  
30 the women who gave birth in Tosamaganga Hospital from 1 January to 30 June 2014 and from 1 March to  
31 30 November 2015. During these two periods, an Italian obstetrics and gynecology resident doctor was  
32 available to support the hospital's maternity staff and ensure the completeness of patient charts. Because the  
33 resident doctor was absent in the labour ward from July 2014 to February 2015, the information routinely  
34 collected in that period was considered inadequate for analysis and thus could not be included. Foetal  
35 position and information on previous deliveries are two important variables for the Robson classification  
36 which were not collected and recorded systematically and routinely.  
37  
38  
39

40 In addition, combining the two periods made it possible to increase our study population and avoid seasonal  
41 bias due to the dry and rainy season. We used the Robson classification to categorize each of the women  
42 into one of ten groups. A full description of this classification system has been provided in the Supplementary  
43 File.  
44  
45  
46  
47  
48

### 49 **Setting**

50  
51 St. John of the Cross Tosamaganga Hospital belongs to the Roman Catholic Church, Diocese of Iringa, and  
52 is supported in terms of governance and human resources by Doctors with Africa CUAMM (Collegio  
53 Universitario Aspiranti Medici Missionari), an Italian non governmental organisation (NGO). Although the  
54 hospital is a private facility, it has been officially integrated into the Tanzanian public health system since  
55 2007 in the context of the Private Public Partnership (PPP) framework and is recognised as a Council  
56  
57  
58  
59  
60

1  
2  
3 Designated Hospital for Iringa District Council. Tosamaganga Hospital is the only Comprehensive  
4 Emergency Obstetric and Newborn Care (CEmONC) Center in Iringa Rural District, serving an estimated  
5 population of 265,000 inhabitants.  
6  
7

8 Tosamaganga Hospital handles approximately 2,300 deliveries a year. The hospital had a total of 165 beds,  
9 48 of which were in the maternity department, including 12 Obstetrics, 18 in Vaginal Post-Partum and 18 in  
10 Caesarean Section Post-Partum. There was also a Labour Room and a small neonatal resuscitation room.  
11 There was no anesthesiologist in the hospital. Pediatric Ward (32 beds) was served by only one pediatrician  
12 present during the day in and on-call at night.  
13  
14  
15

16 The maternity department had two functioning operating theatres, one for major and one for minor surgical  
17 procedures (e.g. dilation and curettage, dressing). Midwives monitored labour progression with the use of a  
18 partograph, and the foetal heart rate was checked through intermittent auscultation done with a Pinard. An  
19 ultrasound machine was available, but not routinely used for labour assistance. The human resources allowed  
20 to perform CS during the study included a gynecologist, a medical doctor (MD) and five assistant medical  
21 doctors (AMD). The maternity staff included ten midwives divided over three shifts (3 in the morning, 2 in  
22 the afternoon and 2 at night) as well as a clinical officer. In addition to Tosamaganga Hospital, there were  
23 10 health centres and 62 dispensaries in the district. None of them were allowed to perform CS.  
24  
25  
26  
27  
28  
29  
30  
31

### 32 **Variables and Data Collection**

33 The data was collected retrospectively from hospital registers (Labour Room, Maternity Ward and Operating  
34 Theatre) and patients charts in a Microsoft Excel data-extraction form specifically designed for this study  
35 (see Supplementary File). All data sources were compared to verify the quality of the information. For each  
36 woman who gave birth in the hospital, we collected data on maternal age, obstetric history (parity, previous  
37 caesarean section), foetal presentation, gestational age (using the date of the last menstrual period – LMP)  
38 and onset of labour (spontaneous, induced, pre-labour CS). Final mode of delivery was classified into two  
39 categories: vaginal delivery and caesarean section. Vaginal delivery could have been either (1) simple  
40 vaginal delivery which included all vaginal deliveries not requiring forceps or vacuum although they may  
41 have had episiotomy; and (2) operative vaginal delivery which included all vaginal deliveries that required  
42 forceps or vacuum.  
43  
44  
45  
46  
47  
48  
49

50 For each woman who underwent a CS, a single indication was assigned as the one for use the procedure.  
51 When more than one indication was recorded in the woman's records and hospital charts, the authors selected  
52 only one for the analysis. This was done according to a pre-defined hierarchy devised for this study based  
53 on earlier proposals in the literature[19, 22-23]: (1) urgent or emergency CS (considering eclamptic, abruptio  
54 placentae, uterine rupture), mechanical or dynamic dystocia; (2) previous scar(s); (3) malpresentation; (4)  
55 cephalopelvic disproportion; (5) foetal distress; (6) breech; (7) twins; and others. We collected maternal  
56  
57  
58  
59  
60

1  
2  
3 outcomes (death before discharge), neonatal outcomes (birth weight, Apgar score at 1 and 5 minutes, death  
4 before discharge) and referral status (formally referred from village-level dispensaries, rural health centres  
5 or self-referred).  
6  
7

8 Because the date of last menstruation period (LMP) was missing from most of the records (n=2,444; 81.1%),  
9 we used birth weight  $\geq 2500$  g as a proxy for gestational age  $\geq 37$  weeks[24]. This adaptation has been  
10 suggested and previously used for the Robson classification in settings where it is challenging to assign  
11 gestational age accurately[25-27].  
12  
13

14  
15 Exclusion criteria were birth weight  $< 500$  g (proxy for gestational age  $< 22$  weeks). No data was collected  
16 on congenital malformations and all cases were included. For twin deliveries, only the first twin's outcome  
17 was taken into account.  
18  
19

20  
21 The caesarean delivery rate was defined as the number of caesarean deliveries over the total number of live  
22 births[9, 15]. The maternal mortality rate was defined as the number of maternal deaths over the total number  
23 of women who gave birth regardless of birth outcome. We defined a neonatal composite outcome: severe  
24 neonatal outcome as the total number of stillbirths, early neonatal deaths (death of a live born neonate, by  
25 discharge or day 7 of life whichever occurred first) and birth discharged alive with an Apgar score at 5 min  
26 of  $< 7$ . The data available did not allow us to differentiate between fresh and macerated stillbirths. Deaths  
27 occurring after discharge were not captured. During the 2015 study period (1 March to 30 November),  
28 information was also collected on who performed the CS (gynecologist, medical doctor-MD, assistant  
29 medical doctor-AMD).  
30  
31  
32  
33

34  
35 Each woman was categorized into one of ten groups using the Robson classification[28]. We used the  
36 recommended subdivision for Groups 2 and 4 into induced labour (2a or 4a) and pre-labour CS (2b or 4b).  
37 Group 5 was also divided into 5.1 (women with only one previous CS) and 5.2 (women with two or more  
38 previous CS)[28]. We analysed intrapartum and postpartum perinatal mortality by type of delivery and using  
39 the Robson classification.  
40  
41  
42  
43  
44  
45

#### 46 **Patient and Public Involvement**

47  
48 No patients/or members of the public were involved in the definition of the research question or outcome  
49 measures, nor in the design and implementation of the study. We have no plans to involve patients/members  
50 of the public in the dissemination of the study's results.  
51  
52  
53  
54  
55

#### 56 **Results**

From 1 January to 30 June 2014 and from 1 March to 30 November 2015, 3,052 women gave birth in the Tosamaganga Hospital. Complete information was available for 3,012 (98.7%) of these deliveries, all of which were included in the Robson classification. The CS rate in the population included in our analysis was 35.2% of all births.

Table 1 summarizes the characteristics of the study population. The mean age of the women was 25.6 years (range 14-45 years). Among all deliveries, 1,691 women were multiparous (56.1%), 370 (12.3%) had undergone one previous CS, 111 (3.7%) two previous CS, and 38 (1.3%) had undergone 3 or more (Table 1).

Table 1: Characteristics of women delivered during the period from January to June 2014 and March to November 2015 in Tosamaganga Hospital, Tanzania (n=3012).

|                 |                                           |               |
|-----------------|-------------------------------------------|---------------|
| Maternal Age    | <i>Mean</i>                               | 25.6          |
|                 | <i>Range</i>                              | 14-45         |
| Parity          | <i>Nulliparous (%)</i>                    | 1,321 (43.9%) |
|                 | <i>Multiparous (%)</i>                    | 1,691 (56.1%) |
| Previous CS     | <i>No previous CS (%)</i>                 | 2,493 (82.8%) |
|                 | <i>One previous CS (%)</i>                | 370 (12.3%)   |
|                 | <i>Two previous CS (%)</i>                | 111 (3.7%)    |
|                 | <i>Three or more previous CS (%)</i>      | 38 (1.3%)     |
| Referral status | <i>Self-admitted (%)</i>                  | 2844 (94.4%)  |
|                 | <i>Referred from other facilities (%)</i> | 168 (5.6%)    |

CS: Caesarean section

Table 2 shows the Robson classification. Almost 90% of the women admitted for delivery in this hospital were women classified into Groups 1 through 5 and about two-thirds into Groups 1 through 4.

Of the nulliparous women with a term singleton fetus in cephalic presentation (n=1,184), 1,128 (95.3%) went into labour spontaneously, 32 (2.7%) were induced, and 24 (2%) had a pre-labour CS (Tables 2 and 3). Similarly, of the multiparous women with a term singleton fetus in cephalic presentation (n=1,019), 974 (95.6%) went into labour spontaneously, 21 (2%) were induced and 24 (2.4%) had a pre-labour CS.

Women admitted to the hospital for delivery with a term singleton fetus in cephalic presentation who entered labour spontaneously accounted for 70% of the obstetric population. They had CS rates of 27.4% and 15.1% in nulliparous and multiparous, respectively.

Table 2: The Robson Reporting Table and neonatal outcomes by Robson group, Tosamaganga Hospital, Tanzania, January - June 2014 and March - November 2015.

| Group* |                                                                                                  | Number of CS** in group | Number of women in group | Group Size (%) | Group CS Rate (%) | Absolute group contribution to overall CS rate (%) | Relative contribution of group to overall CS rate (%) | Stillbirth [N stillbirth/N women (%)] | Early neonatal death*** [N neonatal deaths/N women (%)] | Apgar < 7 at 5 minutes [N live birth Apgar <7/N women (%)] |
|--------|--------------------------------------------------------------------------------------------------|-------------------------|--------------------------|----------------|-------------------|----------------------------------------------------|-------------------------------------------------------|---------------------------------------|---------------------------------------------------------|------------------------------------------------------------|
| 1      | Nulliparous, single cephalic, term pregnancy, in spontaneous labour                              | 309                     | 1,128                    | 37.5%          | 27.4%             | 10.3%                                              | 29.2%                                                 | 9 (0.8%)                              | 28 (2.5%)                                               | 24 (2.1%)                                                  |
| 2      | Nulliparous, single cephalic, term pregnancy, induced labour or elective CS                      | 35                      | 56                       | 1.9%           | 62.5%             | 1.2%                                               | 3.3%                                                  | 8 (14.3%)                             | -                                                       | 1 (1.8%)                                                   |
| 3      | Multiparous (excluding prev. CS), single cephalic, term pregnancy, in spontaneous labour         | 147                     | 974                      | 32.3%          | 15.1%             | 4.9%                                               | 13.9%                                                 | 16 (16%)                              | 13 (1.3%)                                               | 13 (1.3%)                                                  |
| 4      | Multiparous (excluding prev. CS), single cephalic, term pregnancy, induced labour or elective CS | 25                      | 45                       | 1.5%           | 55.6%             | 0.8%                                               | 2.4%                                                  | 7 (15.6%)                             | -                                                       | 1 (2.2%)                                                   |
| 5      | One previous CS, single cephalic, term pregnancy                                                 | 404                     | 463                      | 15.4%          | 87.3%             | 13.4%                                              | 38.1%                                                 | 5 (1.1%)                              | 2 (0.4%)                                                | 8 (1.7%)                                                   |
| 6      | All nulliparous breeches                                                                         | 13                      | 21                       | 0.7%           | 61.9%             | 0.4%                                               | 1.2%                                                  | 2 (9.5%)                              | 2 (9.5%)                                                | 3 (14.3%)                                                  |
| 7      | All multiparous breeches (including prev. CS)                                                    | 16                      | 32                       | 1.1%           | 50.0%             | 0.5%                                               | 1.5%                                                  | 5 (15.6%)                             | 4 (12.5%)                                               | -                                                          |

|    |                                                   |              |              |             |              |              |             |                  |                  |                  |
|----|---------------------------------------------------|--------------|--------------|-------------|--------------|--------------|-------------|------------------|------------------|------------------|
| 8  | All multiple pregnancies (including prev. CS)     | 48           | 77           | 2.6%        | 62.3%        | 1.6%         | 4.5%        | 3 (3.9%)         | 7 (9.1%)         | -                |
| 9  | All abnormal lies (including prev. CS)            | 30           | 30           | 1.0%        | 100.0%       | 1.0%         | 2.8%        | 1 (3.3%)         | 1 (3.3%)         | 3 (10%)          |
| 10 | All single cephalic, preterm (including prev. CS) | 33           | 186          | 6.2%        | 17.7%        | 1.1%         | 3.1%        | 22 /11.8%        | 17 (9.1%)        | 15 (8.1%)        |
|    | <b>TOTAL</b>                                      | <b>1,060</b> | <b>3,012</b> | <b>100%</b> | <b>35.2%</b> | <b>35.2%</b> | <b>100%</b> | <b>78 (2.6%)</b> | <b>74 (2.5%)</b> | <b>68 (2.3%)</b> |

**Unclassifiable:** 40 cases, 1.3% (40/3,052)

\* Birth weight  $\geq$  2500 g was used as proxy for GA  $>$ 37 weeks

\*\* CS: Caesarean Section

\*\*\* Early neonatal death was defined as the death of a live born neonate, by discharge or day 7 of life (whichever occurred first)

Table 3: The Robson classification Table showing only the subdivisions in Groups 2, 4 and 5, Tosamaganga Hospital, Tanzania, January - June 2014 and March - November 2015.

| Group*                                                                               | Number of CS** in group | Number of women in group | Group Size (%) | Group CS Rate (%) | Absolute group contribution to overall CS rate (%) | Relative contribution of group to overall CS rate (%) |
|--------------------------------------------------------------------------------------|-------------------------|--------------------------|----------------|-------------------|----------------------------------------------------|-------------------------------------------------------|
| 2a<br>Nulliparous, single cephalic, S37 weeks, induced                               | 11                      | 32                       | 1.1%           | 34.4%             | 0.4%                                               | 1.0%                                                  |
| 2b<br>Nulliparous, single cephalic, S37 weeks, CS before labour                      | 24                      | 24                       | 0.8%           | 100.0%            | 0.8%                                               | 2.3%                                                  |
| 4a<br>Multiparous (excluding prev. CS), single cephalic, S37 weeks, induced          | 1                       | 21                       | 0.7%           | 4.8%              | 0.0%                                               | 0.1%                                                  |
| 4b<br>Multiparous (excluding prev. CS), single cephalic, S37 weeks, CS before labour | 24                      | 24                       | 0.8%           | 100.0%            | 0.8%                                               | 2.3%                                                  |

|     |                                                     |     |     |       |       |      |       |
|-----|-----------------------------------------------------|-----|-----|-------|-------|------|-------|
| 5.1 | One previous CS, single cephalic, S37 weeks         | 272 | 327 | 10.9% | 83.2% | 9.0% | 25.7% |
| 5.2 | Two or more previous CS, single cephalic, S37 weeks | 132 | 136 | 4.5%  | 97.1% | 4.4% | 12.5% |

\* Birth weight  $\geq$  2500 g was used as proxy for GA >37 weeks.

\*\* CS: Caesarean Section

We analysed and interpreted the Robson Table and the data according to the Robson classification interpretation guidelines published by WHO[28, 29] which is shown in Table 4.

Table 4: Interpretation of the Robson classification in Tosamaganga Hospital, Tanzania, January - June 2014 and March - November 2015 following the WHO Robson Classification Interpretation Manual.

|                           |                                                                                                                                                                                                                                                                                                                                                                                                                                                                                                                                                                                                                                                                                                                                                                                                                                                                                                                                                                                                                                                                                                                                                                                                                                                                                                                                                                                                                                                                                                                                                                                                                                                                                                                                                                                                                                                                                                                                                                                                                                                                                                                                                                |
|---------------------------|----------------------------------------------------------------------------------------------------------------------------------------------------------------------------------------------------------------------------------------------------------------------------------------------------------------------------------------------------------------------------------------------------------------------------------------------------------------------------------------------------------------------------------------------------------------------------------------------------------------------------------------------------------------------------------------------------------------------------------------------------------------------------------------------------------------------------------------------------------------------------------------------------------------------------------------------------------------------------------------------------------------------------------------------------------------------------------------------------------------------------------------------------------------------------------------------------------------------------------------------------------------------------------------------------------------------------------------------------------------------------------------------------------------------------------------------------------------------------------------------------------------------------------------------------------------------------------------------------------------------------------------------------------------------------------------------------------------------------------------------------------------------------------------------------------------------------------------------------------------------------------------------------------------------------------------------------------------------------------------------------------------------------------------------------------------------------------------------------------------------------------------------------------------|
| <b>Quality of data</b>    | <ul style="list-style-type: none"> <li>The Caesarean Section (CS) rate of the group is 100% indicating a good quality of data</li> </ul>                                                                                                                                                                                                                                                                                                                                                                                                                                                                                                                                                                                                                                                                                                                                                                                                                                                                                                                                                                                                                                                                                                                                                                                                                                                                                                                                                                                                                                                                                                                                                                                                                                                                                                                                                                                                                                                                                                                                                                                                                       |
| <b>Type of population</b> | <ul style="list-style-type: none"> <li>The size of Groups 1 + 2 (39.5%) is within the expected range. However, the ratio of the size of Group 1 versus that of Group 2 is very high (20.1). In the WHO Multicountry Study reference population (population in the WHO study with relatively low CS rates as well as good labour and childbirth outcomes), this ratio was found to be 6.3[28, 30]. Similarly, the ratio of the size of Group 3 versus that of Group 4 is 21.6 - very high compared with the 6.3 in the WHO study[28, 30]. Both high rates probably indicate the need to increase inductions in these groups of women (term with singleton fetus in cephalic presentation) or even to avoid performing pre-labour CS. This is consistent with the high CS rates found in Groups 1 and 3 and our data on stillbirth and neonatal deaths. Despite their being lower-risk groups, 37 (24%) and 29 (19%) of the total 152 perinatal deaths that occurred during the study period were in Groups 1 and 3, respectively. Only Group 10 had a larger number of perinatal deaths with 39 (25.7%) but this is a high-risk group where the women had singleton pregnancies in cephalic presentation preterm.</li> <li>The size of Groups 3 + 4 is 33.9%. Since Tanzania has a high fertility rate, we expected a higher number of multiparous women. This can be explained by the very high size of Group 5 (15.4%) with a CS rate of 87%, which contributes to about 38% of all the CS performed in the hospital.</li> <li>The size Groups 6 + 7 is 1.6%, which is below the expected range for breeches. Moreover, the ratio of Group 6/Group 7 (0.5) is unusual since breeches are more frequent in nulliparas than multiparas. This could indicate errors in data collection due potentially to misclassification of nulliparous women with breech presentation into Group 1.</li> <li>The size of Group 10 is 6.2% is slightly higher than that proposed by Robson (5%) and that found in the WHO Study (4.2%). Even if Tosamaganga Hospital is a referral hospital, only 168 women (5.6%) were referred, 107 (63.7%) of whom delivered by</li> </ul> |



|                                      |                                                                                                                                                                                                                                                                                                                                                                                                                                                                                                                                                                                                                                                                                                                                                                                                                                                                                                                                                                                                                                                                                                                                                                                                                                                                                                                                                                                                                                                                                                                                                                                                                                                                                                                                                                                                                                                                                                                                                                                                                                                                                                                                                                                                                                                                                                                                                                                                                                                                                                                                                                                                                                                                                                                                                                                                                                                                                                                                                                                                                |
|--------------------------------------|----------------------------------------------------------------------------------------------------------------------------------------------------------------------------------------------------------------------------------------------------------------------------------------------------------------------------------------------------------------------------------------------------------------------------------------------------------------------------------------------------------------------------------------------------------------------------------------------------------------------------------------------------------------------------------------------------------------------------------------------------------------------------------------------------------------------------------------------------------------------------------------------------------------------------------------------------------------------------------------------------------------------------------------------------------------------------------------------------------------------------------------------------------------------------------------------------------------------------------------------------------------------------------------------------------------------------------------------------------------------------------------------------------------------------------------------------------------------------------------------------------------------------------------------------------------------------------------------------------------------------------------------------------------------------------------------------------------------------------------------------------------------------------------------------------------------------------------------------------------------------------------------------------------------------------------------------------------------------------------------------------------------------------------------------------------------------------------------------------------------------------------------------------------------------------------------------------------------------------------------------------------------------------------------------------------------------------------------------------------------------------------------------------------------------------------------------------------------------------------------------------------------------------------------------------------------------------------------------------------------------------------------------------------------------------------------------------------------------------------------------------------------------------------------------------------------------------------------------------------------------------------------------------------------------------------------------------------------------------------------------------------|
|                                      | <p>CS. For this reason, we consider that the larger sizes of Groups 8 and 10 cannot be justified by a particularly high-risk population.</p> <ul style="list-style-type: none"> <li>• Malnutrition and other concurrent diseases may have caused growth retardation and errors in pregnancy dating based on neonatal weight.</li> </ul>                                                                                                                                                                                                                                                                                                                                                                                                                                                                                                                                                                                                                                                                                                                                                                                                                                                                                                                                                                                                                                                                                                                                                                                                                                                                                                                                                                                                                                                                                                                                                                                                                                                                                                                                                                                                                                                                                                                                                                                                                                                                                                                                                                                                                                                                                                                                                                                                                                                                                                                                                                                                                                                                        |
| <p><b>Caesarean section rate</b></p> | <ul style="list-style-type: none"> <li>• In all groups, the CS rates are higher than the expected range[28, 30].</li> <li>• It has been proposed that CS rates in Group 1 of about 10% are achievable. However, the abovementioned high ratio of Group 1 versus Group 2 may be responsible for the high CS rate(27.4%) in this group. If insufficient numbers of women are induced or have necessary pre-labour CS, it is more likely that these women will need a CS at a later stage of labour. In addition, the high CS rate in Group 2 is not caused by the size of Group 2b (pre-labour CS, only 0.8% of the population), but mainly by a very low size of Group 2a (1.1% of the population) and by the poor success for induction with a consequent high C/S rate (34.4%) in this group as well. Similar arguments apply to Groups 3 and 4. The high CS rate in Group 4 (55.5%) is not justified by the high size of Group 4b (which accounted for only 0,8% of the population), but by the small size of Group 4a (just 0.7% of the population). Particularly in Groups 1 and 3, a large number of CS were performed with the diagnosis of dystocia. This might indicate a poor quality of diagnosis of dystocia and sub-optimal management of the active phase of labour.</li> <li>• The very high CS rate in Group 5 (87.2%) is not justified by the proportion of women with 2 or more CS (Group 5.2) who make up one-third of this group. CS rates in women with one CS (Group 5.1) and two or more CS (Group 5.2) are both high (83.2% and 97%, respectively), indicating the common practice of performing CS in women with previous scar. These rates contrast markedly with the 50-60% rates considered appropriate by the Robson guideline and the 74.4% found in the WHO Study[28, 30]. Nevertheless, an assessment of the hospital's capacity to offer safe trial of labour after CS (TOLACs) is crucial prior to making recommendation that more women be offered one Vaginal birth after caesarean (VBAC) was minimally practiced probably due to the inadequate number of midwives available to attend women in labour. Moreover, the lack of information regarding previous caesarean deliveries (how they were performed and whether or not complications occurred) may have exacerbated doctor's fear regarding whether to offer a TOLAC.</li> <li>• Looking at the higher-risk groups, the CS rate in Group 8 is within the expected range, while the CS rate in Group 10 is lower than expected, probably indicating a high rate of spontaneous preterm labour or a high incident of low birth weight (since newborn weight was used as a proxy for gestational age)[28, 30].</li> <li>• Considering the contribution of the groups to the overall CS rate, Groups 1, 2 and 5 account for 70.6% of all CS, a higher percentage than expected, and of that figure, Group 5 accounts for 38.1% indicating, as already mentioned, a very high CS rate in the previous years.</li> </ul> |

Women in Group 5 (previous CS) constituted about 15% of the obstetric population of the hospital, with a CS rate of 87%. Two-thirds of these women had undergone just one previous CS while one-third had undergone two or more CS (Tables 2 and 3).

Overall, the most frequent indication for performing a CS was one or more previous CS (39.2%), followed by dystocia (22.3%) and then foetal distress (12.8%) (Table 5).

Table 5: Indication for Caesarean Section in the study population, Tosamaganga Hospital, Tanzania, January - June 2014 and March - November 2015.

|                                         |              |               |
|-----------------------------------------|--------------|---------------|
| Previous scar                           | 416          | 39.2%         |
| Mechanical or dynamic dystocia          | 236          | 22.3%         |
| Foetal distress                         | 136          | 12.8%         |
| Breech                                  | 22           | 2.1%          |
| Twins                                   | 28           | 2.6%          |
| Malpresentation                         | 41           | 3.9%          |
| Cephalopelvic disproportion (CPD)       | 90           | 8.5%          |
| Urgent or Emergency Cesarean Section    | 50           | 4.7%          |
| Others                                  | 41           | 3.9%          |
| <b>Total number of Cesarean Section</b> | <b>1,060</b> | <b>100.0%</b> |

The management of the women with previous CS is shown in Figure 1. During the study there were 519 (17.2%) women with one or more previous CS. One hundred and fifty three (153) of them (29.5%) had an elective pre-labour CS, while the rest (70.5%) went into labour spontaneously. None of these women were induced. Among those who entered labour spontaneously, 71 (19.4%) had a SVD, while 295 (80.6%) had a CS. The indication recorded for the CS was “previous CS” in 97.4% of the women who had a pre-labour CS and 90.5% of the women who went into labour spontaneously (Figure 1).

More than 40% of all CS in the hospital occurred in Groups 1 and 3. Since the CS rate was particularly high for Group 1 (27.7%) and Group 3 (15.2%), we carried out an in depth analysis regarding the indication for the CS in these two groups (Figure 2) The majority of them were performed for dystocia (44.3% in Group 1; 55.1% in Group 3). Among the 168 women referred from other facilities, 107 (63.7%) delivered by CS.

We recorded two maternal deaths (one in Group 1 and one in Group 5) and 152 perinatal deaths (5%) of which 78 (2.6%) were stillbirths and 74 (2.5%) were neonatal deaths. About 70% of all perinatal deaths occurred in Groups 1 (37 deaths), 3 (29 deaths) and 10 (39 deaths). We analysed 220 cases of severe neonatal outcome (stillbirths, neonatal deaths and live births with Apgar score < 7 after 5 minutes) by mode of delivery using the Robson classification as shown in Table 6. A major contribution to severe neonatal outcome was made by Groups 1 (27.7%), 10 (24.5%) and 3 (19.1%). Considering the incidence in each category, the groups with the highest severe neonatal outcome rate were Groups 6 (33.3%), 7 (28.1%), indicating a high risk for newborn in breech deliveries, and 10 (29%) for preterm babies. The incidence of severe neonatal outcome was similar when analysed by mode of delivery. The majority of adverse neonatal outcomes in these groups occurred while performing simple vaginal delivery.

Table 6: Distribution of severe neonatal\* outcomes by Robson group classification.

| Group | Number of severe neonatal outcomes/number of women in group | Proportion of severe neonatal outcomes | Relative contribution of group to the overall severe neonatal outcomes | Proportion of severe neonatal outcome in simple vaginal deliveries** / total simple vaginal deliveries |       | Proportion of severe neonatal outcome in operative vaginal deliveries*** / total operative vaginal deliveries |       | Proportion of severe neonatal outcome in CS**** / total CS |      |
|-------|-------------------------------------------------------------|----------------------------------------|------------------------------------------------------------------------|--------------------------------------------------------------------------------------------------------|-------|---------------------------------------------------------------------------------------------------------------|-------|------------------------------------------------------------|------|
|       |                                                             |                                        |                                                                        |                                                                                                        |       |                                                                                                               |       |                                                            |      |
| 1     | 61/1,128                                                    | 5.4%                                   | 27.7%                                                                  | 43/799                                                                                                 | 5.4%  | 1/20                                                                                                          | 5.0%  | 17/309                                                     | 5.5% |
| 2     | 9/56                                                        | 16.1%                                  | 4.1%                                                                   | 7/19                                                                                                   | 36.8% | 0/2                                                                                                           | 0.0%  | 2/35                                                       | 5.7% |
| 3     | 42/974                                                      | 4.3%                                   | 19.1%                                                                  | 27/818                                                                                                 | 3.3%  | 1/9                                                                                                           | 11.1% | 14/147                                                     | 9.5% |
| 4     | 8/45                                                        | 17.8%                                  | 3.6%                                                                   | 7/20                                                                                                   | 35.0% | -                                                                                                             | -     | 1/25                                                       | 4.0% |
| 5     | 15/463                                                      | 3.2%                                   | 6.8%                                                                   | 1/58                                                                                                   | 1.7%  | 0/1                                                                                                           | 0.0%  | 14/404                                                     | 3.5% |

|              |                 |             |               |                  |             |             |             |                 |             |
|--------------|-----------------|-------------|---------------|------------------|-------------|-------------|-------------|-----------------|-------------|
| 6            | 7/21            | 33.3%       | 3.2%          | 6/8              | 75.0%       | -           | -           | 1/13            | 7.7%        |
| 7            | 9/32            | 28.1%       | 4.1%          | 7/16             | 43.8%       | -           | -           | 2/16            | 12.5%       |
| 8            | 10/77           | 13.0%       | 4.5%          | 4/29             | 13.8%       | -           | -           | 6/48            | 12.5%       |
| 9            | 5/30            | 16.7%       | 2.3%          | -                |             | -           | -           | 5/30            | 16.7%       |
| 10           | 54/186          | 29.0%       | 24.5%         | 47/153           | 30.7%       | -           | -           | 7/33            | 21.2%       |
| <b>Total</b> | <b>220/3012</b> | <b>7.3%</b> | <b>100.0%</b> | <b>149/1,920</b> | <b>7.8%</b> | <b>2/32</b> | <b>6.3%</b> | <b>69/1,060</b> | <b>6.5%</b> |

\* Severe Neonatal Outcome includes stillbirths, neonatal deaths and live births with Apgar score < 7 after 5 minutes

\*\* Simple vaginal delivery: vaginal deliveries not requiring forceps or vacuum, although episiotomy may have been done.

\*\*\* Operative vaginal delivery: vaginal deliveries that required forceps or vacuum.

\*\*\*\* CS: Caesarean Section

We conducted a descriptive analysis on a subset of women who underwent CS during the 2015 study period. Information on the individual who performed the CS and the indication for the CS was available for 574 of the 616 CS conducted (93.1%). Most of the CS were performed by a medical doctor (66.6%; 382) while 25.8% (148) were conducted by an AMD, and 7.7% (44) by a gynecologist. This distribution remains when stratifying by Robson groups and by CS indication (see Supplementary File).

## Discussion

Our analysis of 3,012 deliveries in a rural district hospital in Tanzania using the Robson classification showed a 35% overall CS rate in an obstetric population of about 90% in Robson Groups 1 through 5. These groups were arguably composed of low-risk women, but they presented high CS rates e.g. 27.4% and 15.1% in Groups 1 and 3, respectively, who were women at term with a single foetus in cephalic presentation without previous CS who entered labour spontaneously.

High CS rates have been reported in other studies conducted in Tanzania[26, 31] (for example 31% at the Muhimbili Hospital and 35% in Kilimanjaro Christian Medical Center - KCMC) probably because of the role played by a referral hospital in targeting high-risk pregnancies. This hypothesis could be confirmed by the higher CS rate in women referred from other facilities (63.7% in our study). Sørbye described the situation at the KCMC[32] comparing patients who were referred and self-referred, with CS rates of 55% and 26.9%

1  
2  
3 respectively. However, the referral system seems to have played a minimal role in the setting of our study  
4 since only 5.6% of the women were referred (versus 20% in the Sørbye study).  
5  
6  
7  
8

9  
10 Nilsen et al.[31] hypothesises that poor quality of care at the dispensary and health centre level contributes  
11 to increasing the number of preventable CS in women who are referred late and in critical condition, meaning  
12 that by the time they get to the medical facility an emergency CS is the only possible action[33]. In addition,  
13 several studies have highlighted the inadequacy of obstetric and neonatal care services at the primary level  
14 in Tanzania[34, 35, 36]. In a 2009 study conducted in the Kusu district[37], Kruk et al. showed that 42.2%  
15 of women who gave birth in peripheral units bypassed the nearest services (dispensaries) in favor of higher  
16 level facilities (health centres), governmental or private facilities. 61.4% of women who gave birth at home  
17 had a government dispensary in the village, but chose not to go there for their deliveries.  
18  
19  
20  
21

22  
23 Studies conducted by Straneo et al. in the Tosamaganga catchment area showed high rates of institutional  
24 birth coverage, probably facilitated by the high health facility density[38]. However, coverage and quality  
25 do not always go together and the poorest women were reported accessing lower level health services for  
26 birth where quality of care is sub-optimal due to limited caseloads and poor staffing[39].  
27  
28

29  
30 Comparing our study population according to the Robson classification with those in similar settings,  
31 Tosamaganga Hospital shows a bigger size of Group 5 (15.4% compared to 8.8% in Muhimbili Hospital[26])  
32 and a smaller size of preterm births (6.2% versus 14.6%), while the size of Group 2 and 4 was similar, a  
33 probable confirmation of the low induction rate in both settings.  
34  
35

36  
37 Severe neonatal outcomes were recorded for 220 newborns, almost half of them in Groups 1 and 3, which  
38 may indicate that a high CS rate in these groups did not guarantee better quality of care and was not  
39 accompanied by better neonatal outcomes. This is consistent with the phenomenon of “Perinatal Paradox”  
40 which has been described in the literature[40, 41], as the inconsistency between “our superb ability to care  
41 for the individual patient and our dismal failure to address the problems of the larger society”[41]. The  
42 overuse of unnecessary technology in low-risk women translates in that the growing number of surgical  
43 procedures being performed are not associated with significant improvements in terms of maternal and  
44 neonatal outcomes.  
45  
46  
47  
48

49  
50 Among 152 perinatal deaths, 78 were stillbirths. The highest incidence of severe neonatal outcome was  
51 recorded in Groups 6, 7 and 10, therefore in our hospital breech deliveries and preterm deliveries were the  
52 most at risk. As has been shown by other studies in similar setting[42], a higher risk for adverse neonatal  
53 outcome in breech vaginal deliveries compared with breech CS was recorded in Tosamaganga Hospital,  
54 suggesting sub-optimal management of breech presentation and the need for training to improve the skills  
55 of the providers. In addition, it underlines the need for appropriate, high-quality antenatal healthcare  
56 programs to encourage women to come to the facility earlier in order to identify, monitor and better manage  
57  
58  
59  
60

1  
2  
3 risk factors for preterm birth, pregnancies with fetuses in breech presentation and also decrease the number  
4 of intrapartum deaths and macerated fetuses.  
5  
6

7 In Tosamaganga Hospital most of the CS were performed by the personnel in charge of the delivery room,  
8 namely the MD and the AMD, who handled all duty calls. The gynecologist was involved in case of  
9 emergency and complicated elective or intrapartum CS. In all Robson categories, the highest CS rate was  
10 performed by the MD. Again, this suggests the need for obstetric and gynecological training for the staff and  
11 a closer supervision by the gynecologist. Nyamtema et al. analysed the work of the MD, AMD and midwives  
12 in ten rural health centres in Tanzania[43]. Based on Tanzanian national guidelines and WHO  
13 recommendations[44], 37% of CS were considered unnecessary and preventable. After a staff training  
14 program was carried out and closer supervision provided, the proportion of unnecessary CS fell from 30%  
15 to 17% in HCs and from 37% to 20% in hospitals[43].  
16  
17  
18  
19  
20  
21  
22  
23

### 24 *Strengths and limitations*

25  
26 This study used data from a rural setting that can be compared with analogous population type described in  
27 other settings in the country. The availability of outcome data and the indication for CS made possible a  
28 more contextualized interpretation of CS rates in each group. Moreover, the availability of data on who  
29 performed the CS made it possible to specifically intervene in this aspect where appropriate. There were a  
30 number of limitations to this study. The data was collected retrospectively from handwritten records and  
31 some of the information may not have been recorded accurately. Because of deficient routine data collection,  
32 we included two different time periods (January - June 2014 and March - November 2015) in the study,  
33 meaning that there was discontinuity in data collection. Combining the two periods enlarged our sample size  
34 and allowed us to avoid bias due to seasonal differences. Some variables were not available in patient charts  
35 and registers (e.g. length of labour, who made the decision to perform the CS, or whether the stillbirth were  
36 macerated or fresh). Perinatal mortality may have been underreported since early neonatal deaths occurring  
37 after discharge were not recorded. Data on congenital malformations was not available, making the  
38 interpretation of neonatal outcomes more difficult. Lastly, in the absence of reliable data on gestational age,  
39 we used birth weight as a proxy, a technique found in the literature on earlier studies conducted in low-  
40 resource settings.  
41  
42  
43  
44  
45  
46  
47  
48  
49  
50  
51

### 52 **Conclusion**

53  
54 We found a high CS rate at Tosamaganga Hospital even though the obstetric population served was not  
55 considered particularly high-risk for a referral hospital. Our analysis of the data using the Robson  
56 classification showed that Groups 1 and 3 (women at term with a single foetus in cephalic presentation who  
57  
58  
59  
60

1  
2  
3 entered labour spontaneously) were larger than anticipated and presented very high CS rates. The large size  
4 of these groups and high CS rates combined with the stillbirth and neonatal mortality rates seen in the  
5 hospital may indicate insufficient induction rates and the need to provide more timely referrals so that women  
6 will get to the hospital before their conditions have become too critical.  
7  
8

9  
10 Efforts to improve care and outcomes should include greater investment in the training of medical and  
11 nursing staff to improve the management of labour, with a correct use of the partograph and in particular for  
12 the judicious use of oxytocin augmentation in the management of prolonged labour. Training on the  
13 management of breeches and TOLAC should also be a priority in order to improve the quality of intrapartum  
14 care in the hospital.  
15  
16  
17  
18  
19

20  
21 **Figure 1.** Management of women with one or more previous cesarean sections (CS) during the study period.  
22

23  
24  
25 **Figure 2.** Indication for Caesarean Section (CS) in Group 1 and Group 3.  
26

27  
28 **Acknowledgment:** We would like to thank the hospital management and Maternity Unit staff for their  
29 support in the implementation of this study.  
30

31  
32  
33  
34 **Contributors:** FT, AB and GP contributed to the concept and design of the study. BA collected data. FT  
35 analysed the data. FT and BA drafted the manuscript. DM, GP, GFT and GA supervised and provided  
36 mentorship. APB assisted with the literature research and revision of the manuscript. All authors read and  
37 approved the final version of the manuscript.  
38  
39

40  
41  
42  
43 **Funding:** This research received no grants from any funding agency in the public, commercial or not-for-  
44 profit sectors.  
45  
46  
47

48  
49 **Competing interests:** None  
50

51  
52  
53  
54 **Patient consent:** Not required  
55  
56  
57  
58  
59  
60

1  
2  
3 **Ethics approval:** This study was approved by the Tosamaganga Hospital Review Board, who, in accordance  
4 with the "Declaration of Helsinki", waived the need for the written consent of the patients, given the study's  
5 retrospective nature and the collection of anonymized data. The approval was signed on 22 January 2019,  
6 Ref n. DOIRA/TCDH/VOL/28/201.  
7  
8  
9

10  
11  
12 **Data sharing statement:** Data essential for conclusion are included in this manuscript. Additional data can  
13 be obtained from the corresponding author on reasonable request.  
14  
15

16  
17  
18 **Disclaimer:** The views expressed in this study are the sole responsibility of the authors and do not  
19 necessarily reflect the views of their affiliated organizations.  
20  
21  
22  
23  
24  
25  
26  
27  
28  
29  
30  
31  
32  
33  
34  
35  
36  
37  
38  
39  
40  
41  
42  
43  
44  
45  
46  
47  
48  
49  
50  
51  
52  
53  
54  
55  
56  
57  
58  
59  
60



## References

- 1 Betran AP, Torloni MR, Zhang JJ, et al. WHO Statement on Caesarean Section Rates. *BJOG*. 2016;123(5):667–670 doi:10.1111/1471-0528.13526 [published Online First: 22 July 2015]
- 2 Bailey PE, Paxton A. Program note. Using UN process indicators to assess needs in emergency obstetric services. *Int J Gynaecol Obstet* 2002;76:299-305
- 3 Thomas S, Meadows J, McQueen KA. Access to Cesarean Section Will Reduce Maternal Mortality in Low-Income Countries: A Mathematical Model. *World J Surg* 2016;40:1537–1541. doi:10.1007/s00268-016-3479-0.
- 4 United Nations General Assembly. Transforming our world: The 2030 Agenda for Sustainable Development. 2015. Available from: [https://www.un.org/ga/search/view\\_doc.asp?symbol=A/RES/70/1&Lang=E](https://www.un.org/ga/search/view_doc.asp?symbol=A/RES/70/1&Lang=E) [Accessed January 2019].
- 5 Villar J, Carroli G, Zavaleta N, et al. Maternal and neonatal individual risks and benefits associated with caesarean delivery: multicentre prospective study. *BMJ* 2007;335:102.
- 6 Kennare R, Tucker G, Heard A, et al. Risks of adverse outcomes in the next birth after a first cesarean delivery. *Obstet Gynecol*. 2007;109(2 Pt 1):270-6.
- 7 Daltveit AK, Tollånes MC, Pihlstrøm H, et al. Cesarean delivery and subsequent pregnancies. *Obstet Gynecol*. 2008;111(6):1327-34. doi:10.1097/AOG.0b013e3181744110
- 8 Allen VM1, O'Connell CM, Farrell SA, et al. Economic implications of method of delivery. *Am J Obstet Gynecol*. 2005;193(1):192-7
- 9 Betrán AP, Ye J, Moller AB, et al. The Increasing Trend in Caesarean Section Rates: Global, Regional and National Estimates: 1990-2014. *PLoS One*. 2016;11(2):e0148343. doi:10.1371/journal.pone.0148343.
- 10 Vogel JP, Betrán AP, Vindevoghel N, et al. Use of the Robson classification to assess caesarean section trends in 21 countries: a secondary analysis of two WHO multicountry surveys. *Lancet Glob Health*. 2015;3(5):e260-70. doi:10.1016/S2214-109X(15)70094-X [published Online First: 9 April 2015].
- 11 WHO. Appropriate technology for birth. *Lancet* 1985;2:436–7.
- 12 Ghahiri A, Khosravi M. Maternal and neonatal morbidity and mortality rate in caesarean section and vaginal delivery. *Adv Biomed Res*. 2015;4:193. doi:10.4103/2277-9175.166154 [published Online: 28 September 2015].

- 1  
2  
3 13 Ye J, Zhang J, Mikolajczyk R, et al. Association between rates of caesarean section and maternal and  
4 neonatal mortality in the 21st century: a worldwide population-based ecological study with longitudinal data.  
5 *BJOG*. 2016;123(5):745-53. doi:10.1111/1471-0528.13592 [published Online First: 24 August 2015].  
6  
7  
8 14 Vogel JP, Souza JP, Mori R, et al. Maternal complications and perinatal mortality: findings of the World  
9 Health Organization Multicountry Survey on Maternal and Newborn Health. *BJOG*. 2014;121(Suppl 1):76-  
10 88. doi:10.1111/1471-0528.12633.  
11  
12  
13 15 Ye J, Betrán AP, Guerrero Vela M, et al. Searching for the optimal rate of medically necessary cesarean  
14 delivery. *Birth*. 2014;41(3):237-44. doi:10.1111/birt.12104. [published Online First: 11 April 2014].  
15  
16  
17 16 Betran AP, Torloni MR, Zhang J, et al. What is the optimal rate of caesarean section at population level?  
18 A systematic review of ecologic studies. *Reprod Health*. 2015;12:57. doi:10.1186/s12978-015-0043-6  
19 [Published online 21 June 2015].  
20  
21  
22 17 Betran AP, Torloni MR, Zhang JJ, et al; WHO Statement on Caesarean Section Rates. *BJOG*.  
23 2016;123(5):667-670. doi:10.1111/1471-0528.13526  
24  
25  
26 18 Ogundele OJ, Pavlova M, Groot W. Examining trends in inequality in the use of reproductive health care  
27 services in Ghana and Nigeria. *BMC Pregnancy and Childbirth*. 2018; 18:492 doi.org/10.1186/s12884-018-  
28 2102-9  
29  
30  
31 19 Torloni MR, Betran AP, Souza JP, et al. Classifications for cesarean section: a systematic review. *PLoS*  
32 *One*. 2011;6(1):e14566. doi:10.1371/journal.pone.0014566.  
33  
34  
35 20 FIGO Working Group On Challenges In Care Of Mothers And Infants During Labour And Delivery.  
36 Best practice advice on the 10-Group Classification System for cesarean deliveries. *Int J Gynaecol Obstet*.  
37 2016;135(2):232-233. doi:10.1016/j.ijgo.2016.08.001.[published Online 22 August 2016].  
38  
39  
40 21 Robson MS, Classification of Caesarean sections. *Fetal and Maternal Medicine Review* 2001;12(01):23-  
41 39  
42  
43  
44 22 Anderson GM, Lomas J. Determinants of the increasing cesarean birth rate. Ontario data 1979 to 1982.  
45 *N Engl J Med* 1984; 311:887-892. doi:10.1056/NEJM198410043111405  
46  
47  
48 23 Althabe F, Belizán JM, Villar J, et al. Mandatory second opinion to reduce rates of unnecessary caesarean  
49 sections in Latin America: a cluster randomised controlled trial. *Lancet*. 2004;363:1934-1940.  
50 doi:10.1016/S0140-6736(04)16406-4.  
51  
52  
53 24 WHO. Physical status: the use and interpretation of anthropometry. Technical Report Series No. 854  
54 Available from: [https://apps.who.int/iris/bitstream/handle/10665/37003/WHO\\_TRS\\_854.pdf?sequence=1](https://apps.who.int/iris/bitstream/handle/10665/37003/WHO_TRS_854.pdf?sequence=1)  
55 [Accessed March 2019].  
56  
57  
58  
59  
60

1  
2  
3 25 Tura AK, Pijpers O, de Man M, et al. Analysis of caesarean sections using Robson 10-group classification  
4 system in a university hospital in eastern Ethiopia: a cross-sectional study. *BMJ Open*. 2018;8(4):e020520.  
5 doi:10.1136/bmjopen-2017-020520.  
6  
7

8 26 Litorp H, Kidanto HL, Nystrom L, et al. Increasing caesarean section rates among low-risk groups: a  
9 panel study classifying deliveries according to Robson at a university hospital in Tanzania. *BMC Pregnancy  
10 Childbirth*. 2013;13:107. doi:10.1186/1471-2393-13-107.  
11  
12

13 27 Hanson C, Betrán AP, Opondo C, et al. Trends in caesarean section rates between 2007 and 2013 in  
14 obstetric risk groups inspired by the Robson classification: results from population-based surveys in a low-  
15 resource setting. *BJOG*. 2019;126(6):690-700. doi:10.1111/1471-0528.15534. [published Online First 29  
16 November 2018].  
17  
18  
19

20 28 WHO. Robson Classification: Implementation Manual. Geneva: World Health Organization; 2017.  
21 Licence: CC BY-NC-SA 3.0 IGO. Available from:  
22 <https://apps.who.int/iris/bitstream/handle/10665/259512/9789241513197-eng.pdf?sequence=1> [Accessed  
23 March 2019].  
24  
25  
26

27 29 WHO. Robson Classification: Example of Robson Report Table with Interpretation. Geneva: World  
28 Health Organization; 2017. Licence: CC BY-NC-SA 3.0 IGO. Available from:  
29 <https://apps.who.int/iris/bitstream/handle/10665/259513/WHO-RHR-17.22-eng.pdf?sequence=1> [Accessed  
30 March 2019].  
31  
32  
33

34 30 Souza JP, Betran AP, Dumont A, et al. A global reference for caesarean section rates (C-Model): a  
35 multicountry cross-sectional study. *BJOG*. 2016;123(3):427-36. doi:10.1111/1471-0528.13509. [published  
36 Online First 10 August 2015].  
37  
38  
39

40 31 Nilsen C, Østbye T, Daltveit AK, et al. Trends in and socio-demographic factors associated with  
41 caesarean section at a Tanzanian referral hospital, 2000 to 2013. *Int J Equity Health*. 2014;13:87.  
42 doi:10.1186/s12939-014-0087-1.  
43  
44

45 32 Sørbye IK, Vangen S, Oneko O, et al. Caesarean section among referred and self-referred birthing  
46 women: a cohort study from a tertiary hospital, northeastern Tanzania. *BMC Pregnancy Childbirth*.  
47 2011;11:55. doi: 10.1186/1471-2393-11-55.  
48  
49

50 33 Betrán AP, Temmerman M, Kingdon C, et al. Interventions to reduce unnecessary caesarean sections in  
51 healthy women and babies. *Lancet*. 2018;392(10155):1358-1368. doi:10.1016/S0140-6736(18)31927-5.  
52  
53

54 34 National Bureau of Statistics (NBS) [Tanzania] and Macro International Inc.. 2007. Tanzania Service  
55 Provision Assessment Survey 2006. Dar es Salaam, Tanzania: National Bureau of Statistics and Macro  
56 International Inc. Available from: <https://dhsprogram.com/pubs/pdf/SPA12/SPA12.pdf> [Accessed March  
57 2019].  
58  
59  
60

- 1  
2  
3 35 Leonard KL, Masatu MC. Variations in the quality of care accessible to rural communities in Tanzania.  
4 *Health Aff (Millwood)*. 2007;26(3):w380-92 doi:10.1377/hlthaff.26.3.w380.  
5  
6  
7 36 Gilson L, Alilio M, Heggenhougen K. Community satisfaction with primary health care services: an  
8 evaluation undertaken in the Morogoro region of Tanzania. *Soc Sci Med*. 1994;39(6):767-80.  
9  
10  
11 37 Kruk ME, Mbaruku G, McCord CW, et al. Bypassing primary care facilities for childbirth: a population-  
12 based study in rural Tanzania. *Health Policy Plan*. 2009;24(4):279-88. doi:10.1093/heapol/czp011  
13 [published Online First 20 March 2009].  
14  
15  
16 38 Straneo M, Fogliati P, Pellis I, et al. On the way to universal coverage of maternal services in Iringa rural  
17 District in Tanzania. Who is yet to be reached? *Afr Health Sci*. 2016;16(2):420-8. doi:10.4314/ahs.v16i2.10.  
18  
19  
20 39 Straneo M, Fogliati P, Azzimonti G, et al. Where do the rural poor deliver when high coverage of health  
21 facility delivery is achieved? Findings from a community and hospital survey in Tanzania. *PLoS One*.  
22 2014;9(12):e113995. doi:10.1371/journal.pone.0113995.  
23  
24  
25 40 Rosenblatt RA. The perinatal paradox: doing more and accomplishing less. *Health Aff (Millwood)*  
26 1989;8(3):158-168  
27  
28  
29 41 Kliegman RM. Neonatal technology, perinatal survival, social consequences, and the perinatal paradox.  
30 *Am J Public Health*. 1995;85(7):909-13.  
31  
32 42 Högberg U, Claeson C, Krebs L, et al. Breech delivery at a University Hospital in Tanzania. *BMC*  
33 *Pregnancy Childbirth*. 2016;16(1):342.  
34  
35  
36 43 Nyamtema A, Mwakatundu N, Dominico S, et al. Increasing the availability and quality of caesarean  
37 section in Tanzania. *BJOG*. 2016;123(10):1676-82. doi:10.1111/1471-0528.14223. [published Online First  
38 22 July 2016].  
39  
40  
41 44 WHO. Managing complications in pregnancy and childbirth: a guide for midwives and doctors – 2nd ed.  
42 Geneva: World Health Organization; 2017. Licence: CC BY-NC-SA 3.0 IGO. Available from:  
43 <https://apps.who.int/iris/bitstream/handle/10665/255760/9789241565493-eng.pdf?sequence=1> [Accessed  
44 March 2019].  
45  
46  
47  
48  
49  
50  
51  
52  
53  
54  
55  
56  
57  
58  
59  
60

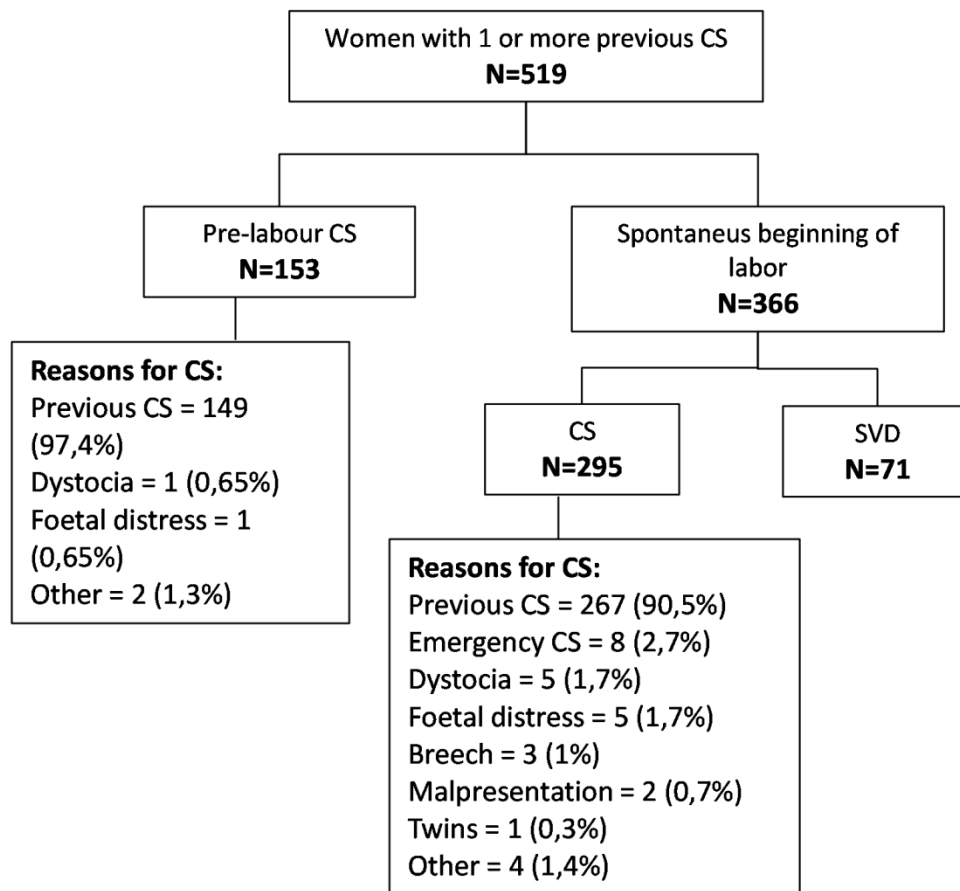

39 Management of women with one or more previous cesarean sections (CS) during the study period.

40  
41  
42  
43  
44  
45  
46  
47  
48  
49  
50  
51  
52  
53  
54  
55  
56  
57  
58  
59  
60

1  
2  
3  
4  
5  
6  
7  
8  
9  
10  
11  
12  
13  
14  
15  
16  
17  
18  
19  
20  
21  
22  
23  
24  
25  
26  
27  
28  
29  
30  
31  
32  
33  
34  
35  
36  
37  
38  
39  
40  
41  
42  
43  
44  
45  
46  
47  
48  
49  
50  
51  
52  
53  
54  
55  
56  
57  
58  
59  
60

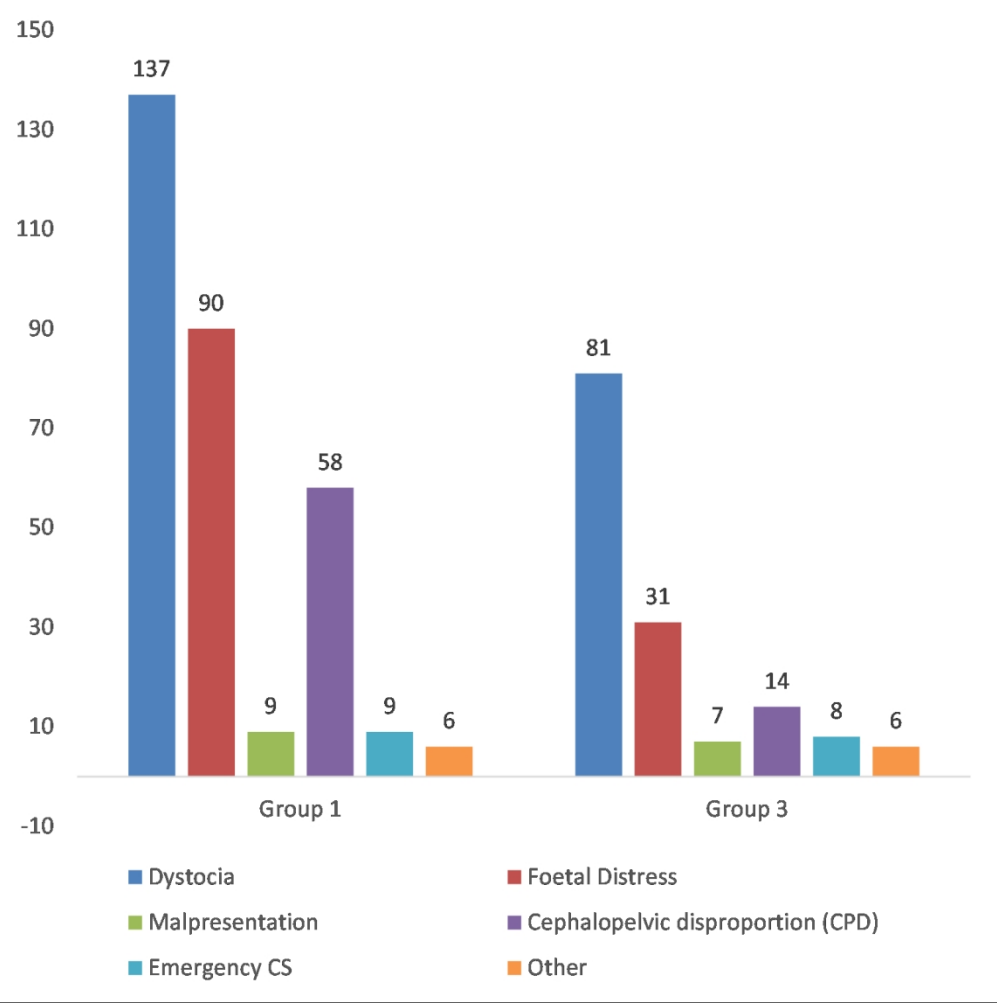

Indication for Caesarean Section (CS) in Group 1 and Group 3.

BMJ Open  
 CLASSIFICATION SYSTEM FOR  
**Caesarean Section**

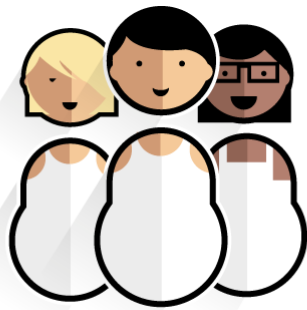

This Classification System for Caesarean Sections is a tool to assist facilities and countries to study caesarean sections in more homogeneous groups of women and in an action-oriented manner.

GROUP 1

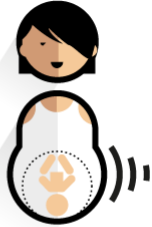

- Nulliparous
- Singleton
- Cephalic
- Term
- Spontaneous labour

GROUP 2

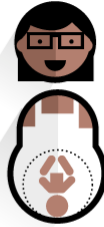

- Nulliparous
- Singleton
- Cephalic
- Term
- Induced labour or pre-labour CS

GROUP 3

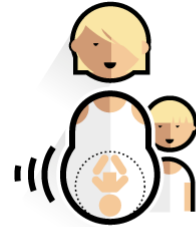

- Multiparous (without previous CS)
- Singleton
- Cephalic
- Term
- Spontaneous labour

GROUP 4

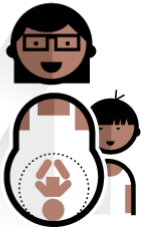

- Multiparous (without previous CS)
- Singleton
- Cephalic
- Term
- Induced labour or pre-labour CS

GROUP 5

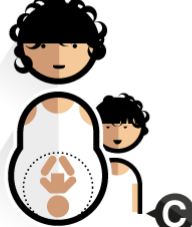

- Multiparous
- Singleton
- Cephalic
- Term
- Previous uterine scar

GROUP 6

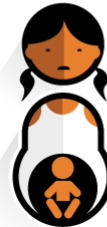

- Nulliparous
- Singleton
- Breech pregnancy

GROUP 7

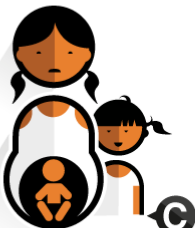

- Multiparous
- Singleton
- Breech pregnancy
- Including women with previous uterine scar

GROUP 8

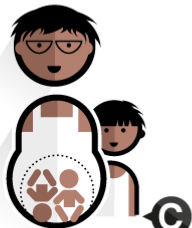

- Multiple pregnancy
- Including women with previous uterine scar

GROUP 9

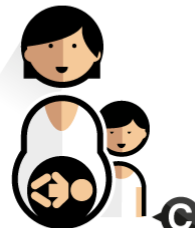

- Singleton
- Transverse / oblique lie
- Including women with previous uterine scar

GROUP 10

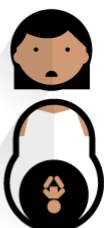

- Singleton
- Cephalic
- Preterm
- Including women with previous uterine scar

GROUP 99

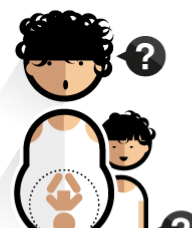

- Women with missing data

LEGEND

- ))) Spontaneous labour
- CS Caesarean section
- ⊙ Missing data
- ⊙ Previous caesarean section

For further information, please contact: World Health Organization Department of Reproductive Health and Research 1211 Geneva 27, Switzerland [reproductivehealth@who.int](mailto:reproductivehealth@who.int)

Graphs on distribution of CS among health professional

Graph 1: Distribution of Cesarean Section (CS) among health professionals stratified in the Robson Classification.

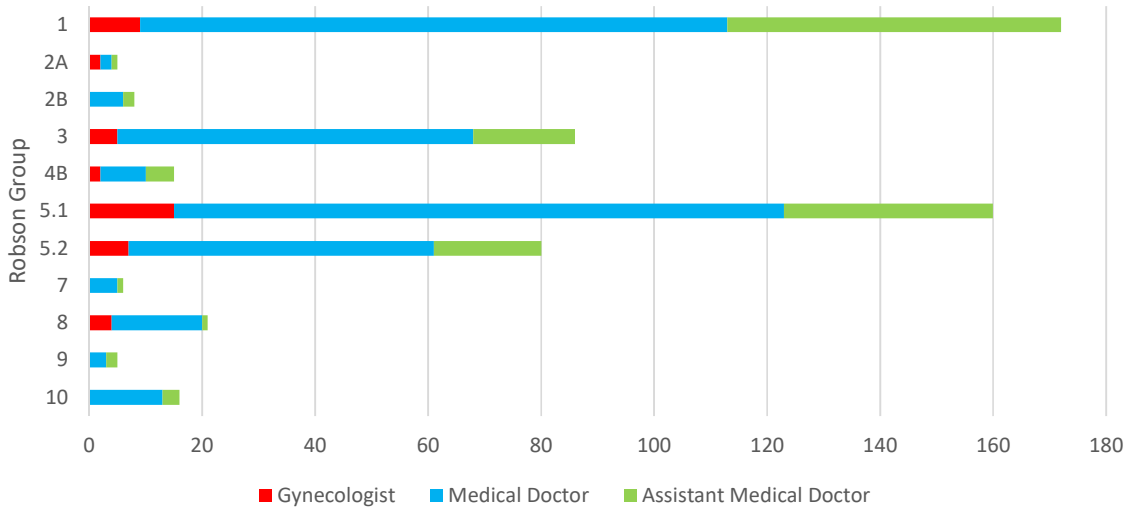

Graph 2: Distribution of Cesarean Section (CS) among health professionals according to indication.

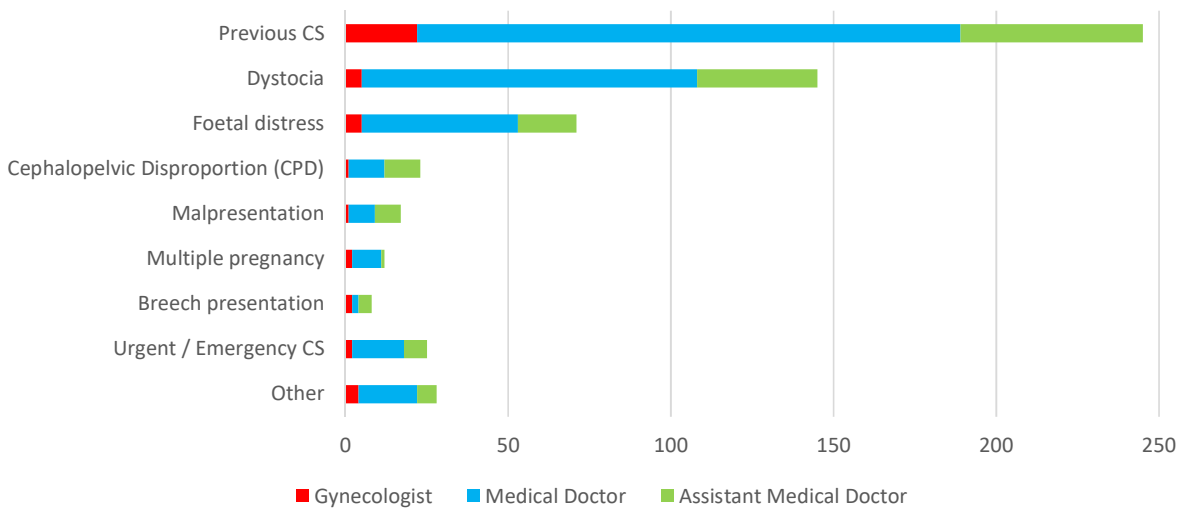



## TOSAMAGANGA HOSPITAL – Deliveries according to Robson Classification

Date \_\_\_\_\_

ID Number \_\_\_\_\_

Age \_\_\_\_\_

Parity \_\_\_\_\_

**Previous CS**  Yes number: \_\_\_\_\_  
 No

**Referred?**  Yes  
 No

**Labour**  spontaneous  
 Induced  
 Elective CS

**Presentation**  cephalic  
 breech  
 oblique / transverse lie

**Fetal number**  Single pregnancy  
 multiple pregnancy

**Mode of delivery**  SVD  
 AVD (Vacuum or forceps)  
 CS

If CS, Indication:  dystocia  
 previous CS  
 foetal distress  
 breech  
 twins  
 malpresentation  
 CPD  
 Urgent CS/emergency (eclampsia, uterine ropture, placenta abruprio/previa..)  
 other \_\_\_\_\_

Birth weight \_\_\_\_\_

**Neonatal outcome**  Live birth  
 Still birth  Fresh  
 Macerated  
 Neonatal Death

APGAR 0 \_\_\_\_\_

APGAR 1 \_\_\_\_\_

**Maternal outcome:**  Alive  
 Dead

## Robson Classification System applied in a rural District Hospital in Tanzania

STROBE Statement—Checklist of items that should be included in reports of *cross-sectional studies*

|                              | Item No | Recommendation                                                                                                                                                                                    | Comments       |
|------------------------------|---------|---------------------------------------------------------------------------------------------------------------------------------------------------------------------------------------------------|----------------|
| <b>Title and abstract</b>    | 1       | (a) Indicate the study's design with a commonly used term in the title or the abstract                                                                                                            | P. 2           |
|                              |         | (b) Provide in the abstract an informative and balanced summary of what was done and what was found                                                                                               | P. 2           |
| <b>Introduction</b>          |         |                                                                                                                                                                                                   |                |
| Background/rationale         | 2       | Explain the scientific background and rationale for the investigation being reported                                                                                                              | P. 5           |
| Objectives                   | 3       | State specific objectives, including any prespecified hypotheses                                                                                                                                  | P. 5           |
| <b>Methods</b>               |         |                                                                                                                                                                                                   |                |
| Study design                 | 4       | Present key elements of study design early in the paper                                                                                                                                           | P. 5           |
| Setting                      | 5       | Describe the setting, locations, and relevant dates, including periods of recruitment, exposure, follow-up, and data collection                                                                   | Pp. 5,6        |
| Participants                 | 6       | (a) Give the eligibility criteria, and the sources and methods of selection of participants                                                                                                       | P. 5           |
| Variables                    | 7       | Clearly define all outcomes, exposures, predictors, potential confounders, and effect modifiers. Give diagnostic criteria, if applicable                                                          | Pp. 6,7        |
| Data sources/<br>measurement | 8*      | For each variable of interest, give sources of data and details of methods of assessment (measurement). Describe comparability of assessment methods if there is more than one group              | Pp. 6,7        |
| Bias                         | 9       | Describe any efforts to address potential sources of bias                                                                                                                                         | Pp. 5,6,7      |
| Study size                   | 10      | Explain how the study size was arrived at                                                                                                                                                         | P. 5           |
| Quantitative<br>variables    | 11      | Explain how quantitative variables were handled in the analyses. If applicable, describe which groupings were chosen and why                                                                      | P. 6           |
| Statistical methods          | 12      | (a) Describe all statistical methods, including those used to control for confounding                                                                                                             | P. 5           |
|                              |         | (b) Describe any methods used to examine subgroups and interactions                                                                                                                               | P. 5           |
|                              |         | (c) Explain how missing data were addressed                                                                                                                                                       | P. 7           |
|                              |         | (d) If applicable, describe analytical methods taking account of sampling strategy                                                                                                                | Not applicable |
|                              |         | (e) Describe any sensitivity analyses                                                                                                                                                             | Not applicable |
| <b>Results</b>               |         |                                                                                                                                                                                                   |                |
| Participants                 | 13*     | (a) Report numbers of individuals at each stage of study—eg numbers potentially eligible, examined for eligibility, confirmed eligible, included in the study, completing follow-up, and analysed | Pp. 7,8        |
|                              |         | (b) Give reasons for non-participation at each stage                                                                                                                                              | P. 7           |
|                              |         | (c) Consider use of a flow diagram                                                                                                                                                                | -              |
| Descriptive data             | 14*     | (a) Give characteristics of study participants (eg demographic, clinical, social) and information on exposures and potential                                                                      | Table 1        |

|                          |     |                                                                                                                                                                                                              |                                                                      |
|--------------------------|-----|--------------------------------------------------------------------------------------------------------------------------------------------------------------------------------------------------------------|----------------------------------------------------------------------|
|                          |     | confounders                                                                                                                                                                                                  |                                                                      |
|                          |     | (b) Indicate number of participants with missing data for each variable of interest                                                                                                                          | Participant with incomplete data were not considered in the analysis |
| Outcome data             | 15* | Report numbers of outcome events or summary measures                                                                                                                                                         | Table 2, Table 5                                                     |
| Main results             | 16  | (a) Give unadjusted estimates and, if applicable, confounder-adjusted estimates and their precision (eg, 95% confidence interval). Make clear which confounders were adjusted for and why they were included | Not applicable                                                       |
|                          |     | (b) Report category boundaries when continuous variables were categorized                                                                                                                                    | Done                                                                 |
|                          |     | (c) If relevant, consider translating estimates of relative risk into absolute risk for a meaningful time period                                                                                             | -                                                                    |
| Other analyses           | 17  | Report other analyses done—eg analyses of subgroups and interactions, and sensitivity analyses                                                                                                               | Pp 8-11                                                              |
| <b>Discussion</b>        |     |                                                                                                                                                                                                              |                                                                      |
| Key results              | 18  | Summarise key results with reference to study objectives                                                                                                                                                     | P. 12                                                                |
| Limitations              | 19  | Discuss limitations of the study, taking into account sources of potential bias or imprecision. Discuss both direction and magnitude of any potential bias                                                   | P. 16                                                                |
| Interpretation           | 20  | Give a cautious overall interpretation of results considering objectives, limitations, multiplicity of analyses, results from similar studies, and other relevant evidence                                   | Table 6, p. 15                                                       |
| Generalisability         | 21  | Discuss the generalisability (external validity) of the study results                                                                                                                                        | P. 15                                                                |
| <b>Other information</b> |     |                                                                                                                                                                                                              |                                                                      |
| Funding                  | 22  | Give the source of funding and the role of the funders for the present study and, if applicable, for the original study on which the present article is based                                                | P. 18                                                                |

\*Give information separately for exposed and unexposed groups.

**Note:** An Explanation and Elaboration article discusses each checklist item and gives methodological background and published examples of transparent reporting. The STROBE checklist is best used in conjunction with this article (freely available on the Web sites of PLoS Medicine at <http://www.plosmedicine.org/>, Annals of Internal Medicine at <http://www.annals.org/>, and Epidemiology at <http://www.epidem.com/>). Information on the STROBE Initiative is available at [www.strobe-statement.org](http://www.strobe-statement.org).
