# Supplementary material for: Analysis of caesarean section and neonatal outcome using the Robson classification in a rural district hospital in Tanzania: an observational retrospective study
Source: PubMed Central journal article supplement — BMJ Open. 2019 Dec 9;9(12):e033348. doi: 10.1136/bmjopen-2019-033348 (PMC6924846; doi:10.1136/bmjopen-2019-033348), 2019-12-09
Supplement: bmjopen-2019-033348supp002.pdf [file bmjopen-2019-033348supp002.pdf]

## TOSAMAGANGA HOSPITAL – Deliveries according to Robson Classification

Date \_\_\_\_\_

ID Number \_\_\_\_\_

Age \_\_\_\_\_

Parity \_\_\_\_\_

**Previous CS**  Yes number: \_\_\_\_\_  
 No

**Referred?**  Yes  
 No

**Labour**  spontaneous  
 Induced  
 Elective CS

**Presentation**  cephalic  
 breech  
 oblique / transverse lie

**Fetal number**  Single pregnancy  
 multiple pregnancy

**Mode of delivery**  SVD  
 AVD (Vacuum or forceps)  
 CS

If CS, Indication:  dystocia  
 previous CS  
 foetal distress  
 breech  
 twins  
 malpresentation  
 CPD  
 Urgent CS/emergency (eclampsia, uterine ropture, placenta abruprio/previa..)  
 other \_\_\_\_\_

Birth weight \_\_\_\_\_

**Neonatal outcome**  Live birth  
 Still birth  Fresh  
 Macerated  
 Neonatal Death

APGAR 0 \_\_\_\_\_

APGAR 1 \_\_\_\_\_

**Maternal outcome:**  Alive  
 Dead
